# Supplementary material
Source: Research Square preprint supplement (doi:10.21203/rs.3.rs-9521303/v1)
Supplement: Supplementary file 2 [file 51ca58f09e374963276cb500.docx]

**Appendix S1: Supplementary tables and figures**

***Machine learning for predicting clinical outcomes in emergency department patients with acute respiratory infections: A scoping review***

**Table S1**: **Inclusion and exclusion criteria based on the population, intervention, comparator, outcome (PICO) framework and types of studies**

| **PICO framework and study types** | **Inclusion criteria** | **Exclusion criteria** |
| --- | --- | --- |
| Population | - Adults and children presenting with acute respiratory infections (ARIs) to an emergency department (ED). | - Other respiratory-related conditions such as asthma exacerbations without acute respiratory infections, chronic obstructive pulmonary disease exacerbations, tuberculosis, or complications such as sepsis and acute respiratory distress syndrome. |
| Intervention | - Machine learning (ML), including deep learning (DL)-based prediction models applicable at any stage of the ED care pathway (from triage to discharge) to predict outcomes. | - Studies including only the traditional (statistical) regression prediction models (e.g., logistic regression, LASSO regression), without any other ML models. - Studies with ML models that were trained and/or evaluated: (a) in a prehospital or outside of the hospital setting; (b) using information not available or not collected during the ED visit to predict outcomes; (c) only on patients who were hospitalized or admitted to the ICU after being seen in the ED. |
| Comparator | - Studies comparing the performance of ML-based prediction models with other clinical decision support tools /clinical judgement as well as studies that do not include such comparisons. | - None |
| Outcomes | - ML models predicting the following outcomes of interest, with no specific endpoints, include:   a) ED disposition (discharge, hospitalization, intensive care unit admission,  b) Requirement for supplementary oxygen or ventilation support,  c) Mortality,  d) Sepsis or septic shock,  e) Return visits to the ED or another healthcare setting after the initial ED visit,  f) Laboratory tests or imaging performed during or after the initial ED visit,  g) Treatment provided during or after the initial ED visit,  h) Length of ED stay. | - Studies with ML models that were trained and/or evaluated to diagnose or classify ARI (e.g., influenza vs. not influenza, COVID-19 vs. not COVID-19, pneumonia vs. not pneumonia). |
| Study type/characteristics | - Published - Peer-reviewed - Original study - Published in English or French | - Conference abstracts, protocols, letters with no original data, commentaries, editorials, case reports, case series, or any other studies without primary empirical data or structured data; - Reviews (rapid, scoping, systematic); - Preprints (e.g., medRxiv), - Articles published in languages other than English or French |

**Table S2: Search strategy and number of results for each database**

1. **Database: PubMed**

**Date of search:** From inception to July 9th, 2025

**Database limit:** English and French

|  | **# Search** | **Search strategy** | **Results** |
| --- | --- | --- | --- |
| **Concept artificial intelligence/ machine learning/ deep learning** |  |  |  |
| Free vocabulary (title and abstract field) | #1 | "artificial intelligence"[Title/Abstract] OR "artificial general intelligence"[Title/Abstract] OR "artificial learning"[Title/Abstract] OR ("artificial" AND "intelligence") OR "machine learning"[Title/Abstract] OR "machine intelligence"[Title/Abstract] OR ("machine" AND "learning"[Title/Abstract]) OR "deep learning"[Title/Abstract] OR "supervised learning"[Title/Abstract] OR "unsupervised learning"[Title/Abstract] OR "semi-supervised learning" [Title/Abstract] OR "reinforcement learning"[Title/Abstract] OR "ensemble learning"[Title/Abstract] OR "statistical learning" [Title/Abstract] OR "computational intelligence"[Title/Abstract] OR "automated reasoning" [Title/Abstract] OR "computer reasoning"[Title/Abstract] OR "intelligent computation"[Title/Abstract] OR "fuzzy logic" [Title/Abstract] OR "data mining"[Title/Abstract] OR "data science"[Title/Abstract] OR "learning from labeled data"[Title/Abstract] OR "natural language processing"[Title/Abstract] OR "large language model*"[Title/Abstract] OR "GenAI"[Title/Abstract] | 361,997 |
| Controlled vocabulary | #2 | "Machine Learning Algorithms"[Mesh] OR "Machine Learning"[Mesh] OR "Artificial Intelligence"[Mesh] | 241,710 |
| Free and controlled vocabulary | #3 | #1 OR #2 | 451,008 |
| **Concept emergency department/ triage** |  |  |  |
| Free vocabulary (title and abstract field) | #4 | "emergency department*"[Title/Abstract] OR "emergency room*"[Title/Abstract] OR "emergency service*"[Title/Abstract] OR "hospital emergency"[Title/Abstract] OR "emergency hospital service*"[Title/Abstract] OR "emergency ward*"[Title/Abstract] OR "emergency unit*"[Title/Abstract] OR "emergency outpatient*"[Title/Abstract] OR "accident and emergency department*"[Title/Abstract] OR "service emergency"[Title/Abstract] OR "emergency medicine"[Title/Abstract] OR "emergency medical service*"[Title/Abstract] OR "emergency health service*"[Title/Abstract] OR "emergenc*"[Title/Abstract] OR "triage"[Title/Abstract] | 595,867 |
| Controlled vocabulary | #5 | "Emergency Service, Hospital"[Mesh] OR "Emergency Medicine"[Mesh] OR "Emergency Medical Services"[Mesh] OR "Emergency Room Visits"[Mesh] OR "Triage"[Mesh] | 193,743 |
| Free and controlled vocabulary | #6 | #4 OR #5 | 665,081 |
| **Concept respiratory tract infections** |  |  |  |
| Free vocabulary (title and abstract field) | #7 | "respiratory infection*"[Title/Abstract] OR "acute respiratory infection*"[Title/Abstract] OR "respiratory tract infection*"[Title/Abstract] OR "acute respiratory tract infection*"[Title/Abstract] OR "respiratory symptom*"[Title/Abstract] OR "respiratory infection symptom*"[Title/Abstract] OR ("respiratory" AND "infection"[Title/Abstract]) OR "influenza"[Title/Abstract] OR "flu"[Title/Abstract] OR "influenza-like illness"[Title/Abstract] OR "influenza-like symptom*"[Title/Abstract] OR "flu-like illness"[Title/Abstract] OR "flu-like symptom*"[Title/Abstract] OR "respiratory virus*"[Title/Abstract] OR "parainfluenza*"[Title/Abstract] OR "enterovirus*"[Title/Abstract] OR "rhinovirus*"[Title/Abstract] OR "rhino/enterovirus*"[Title/Abstract] OR "entero-rhinovirus*"[Title/Abstract] OR "entero-/rhinovirus*"[Title/Abstract] OR "adenovirus*"[Title/Abstract] OR "respiratory syncytial virus*"[Title/Abstract] OR "human metapneumovirus*"[Title/Abstract] OR "coronavirus*"[Title/Abstract] OR "Covid-19"[Title/Abstract] OR "SARS-CoV-2"[Title/Abstract] OR "severe acute respiratory syndrome"[Title/Abstract] OR "pneumonia"[Title/Abstract] | 919,645 |
| Controlled vocabulary | #8 | "Respiratory Tract Infections"[Mesh] OR "Parainfluenza Virus 1, Human"[Mesh] OR "Parainfluenza Virus 2, Human"[Mesh] OR "Parainfluenza Virus 3, Human"[Mesh] OR "Parainfluenza Virus 4, Human"[Mesh] OR "Enterovirus"[Mesh] OR "Enterovirus Infections"[Mesh] OR "Rhinovirus"[Mesh] OR "Adenovirus Infections, Human"[Mesh] OR "Adenoviruses, Human"[Mesh] OR "Respiratory Syncytial Virus, Human"[Mesh] OR "Respiratory Syncytial Virus Infections"[Mesh] OR "Metapneumovirus"[Mesh] OR "Coronavirus"[Mesh] OR "Coronavirus Infections"[Mesh] | 798,673 |
| Free and controlled vocabulary | #9 | #7 OR #8 | 1,230,853 |
| **Concept prediction model, clinical decision, risk** |  |  |  |
| Free vocabulary (title and abstract field) | #10 | "predict*"[Title/Abstract] OR "predict* model*"[Title/Abstract] OR "predict* learning*"[Title/Abstract] OR "prognosis"[Title/Abstract] OR "prognostic*"[Title/Abstract] OR "clinical prediction"[Title/Abstract] OR "clinical decision*"[Title/Abstract] OR "decision rule*"[Title/Abstract] OR "score*"[Title/Abstract] OR "risk*"[Title/Abstract] OR "stratif*"[Title/Abstract] OR "classification*"[Title/Abstract] OR "algorithm*"[Title/Abstract] OR "performance"[Title/Abstract] | 8,372,912 |
| Controlled vocabulary | #11 | "Prediction Algorithms"[Mesh] OR "Prediction Methods, Machine"[Mesh] OR "Predictive Learning Models"[Mesh] OR "Clinical Decision Rules"[Mesh] OR "Prognosis"[Mesh] | 2,084,789 |
| Free and controlled vocabulary | #12 | #10 OR #11 | 9,371,011 |
| **All concepts combined** | #13 | #3 AND #6 AND #9 AND #12 | **1191** |
| **Language filter** |  |  |  |
| Only English and French | # 13 AND **(English[la] OR French[la])** | ((((("artificial intelligence"[Title/Abstract] OR "artificial general intelligence"[Title/Abstract] OR "artificial learning"[Title/Abstract] OR ("artificial" AND "intelligence") OR "machine learning"[Title/Abstract] OR "machine intelligence"[Title/Abstract] OR ("machine" AND "learning"[Title/Abstract]) OR "deep learning"[Title/Abstract] OR "supervised learning"[Title/Abstract] OR "unsupervised learning"[Title/Abstract] OR "semi-supervised learning" [Title/Abstract] OR "reinforcement learning"[Title/Abstract] OR "ensemble learning"[Title/Abstract] OR "statistical learning" [Title/Abstract] OR "computational intelligence"[Title/Abstract] OR "automated reasoning" [Title/Abstract] OR "computer reasoning"[Title/Abstract] OR "intelligent computation"[Title/Abstract] OR "fuzzy logic" [Title/Abstract] OR "data mining"[Title/Abstract] OR "data science"[Title/Abstract] OR "learning from labeled data"[Title/Abstract] OR "natural language processing"[Title/Abstract] OR "large language model*"[Title/Abstract] OR "GenAI"[Title/Abstract]) OR ("Machine Learning Algorithms"[Mesh] OR "Machine Learning"[Mesh] OR "Artificial Intelligence"[Mesh])) AND (("emergency department*"[Title/Abstract] OR "emergency room*"[Title/Abstract] OR "emergency service*"[Title/Abstract] OR "hospital emergency"[Title/Abstract] OR "emergency hospital service*"[Title/Abstract] OR "emergency ward*"[Title/Abstract] OR "emergency unit*"[Title/Abstract] OR "emergency outpatient*"[Title/Abstract] OR "accident and emergency department*"[Title/Abstract] OR "service emergency"[Title/Abstract] OR "emergency medicine"[Title/Abstract] OR "emergency medical service*"[Title/Abstract] OR "emergency health service*"[Title/Abstract] OR "emergenc*"[Title/Abstract] OR "triage"[Title/Abstract]) OR ("Emergency Service, Hospital"[Mesh] OR "Emergency Medicine"[Mesh] OR "Emergency Medical Services"[Mesh] OR "Emergency Room Visits"[Mesh] OR "Triage"[Mesh]))) AND (("respiratory infection*"[Title/Abstract] OR "acute respiratory infection*"[Title/Abstract] OR "respiratory tract infection*"[Title/Abstract] OR "acute respiratory tract infection*"[Title/Abstract] OR "respiratory symptom*"[Title/Abstract] OR "respiratory infection symptom*"[Title/Abstract] OR ("respiratory" AND "infection"[Title/Abstract]) OR "influenza"[Title/Abstract] OR "flu"[Title/Abstract] OR "influenza-like illness"[Title/Abstract] OR "influenza-like symptom*"[Title/Abstract] OR "flu-like illness"[Title/Abstract] OR "flu-like symptom*"[Title/Abstract] OR "respiratory virus*"[Title/Abstract] OR "parainfluenza*"[Title/Abstract] OR "enterovirus*"[Title/Abstract] OR "rhinovirus*"[Title/Abstract] OR "rhino/enterovirus*"[Title/Abstract] OR "entero-rhinovirus*"[Title/Abstract] OR "entero-/rhinovirus*"[Title/Abstract] OR "adenovirus*"[Title/Abstract] OR "respiratory syncytial virus*"[Title/Abstract] OR "human metapneumovirus*"[Title/Abstract] OR "coronavirus*"[Title/Abstract] OR "Covid-19"[Title/Abstract] OR "SARS-CoV-2"[Title/Abstract] OR "severe acute respiratory syndrome"[Title/Abstract] OR "pneumonia"[Title/Abstract]) OR ("Respiratory Tract Infections"[Mesh] OR "Parainfluenza Virus 1, Human"[Mesh] OR "Parainfluenza Virus 2, Human"[Mesh] OR "Parainfluenza Virus 3, Human"[Mesh] OR "Parainfluenza Virus 4, Human"[Mesh] OR "Enterovirus"[Mesh] OR "Enterovirus Infections"[Mesh] OR "Rhinovirus"[Mesh] OR "Adenovirus Infections, Human"[Mesh] OR "Adenoviruses, Human"[Mesh] OR "Respiratory Syncytial Virus, Human"[Mesh] OR "Respiratory Syncytial Virus Infections"[Mesh] OR "Metapneumovirus"[Mesh] OR "Coronavirus"[Mesh] OR "Coronavirus Infections"[Mesh]))) AND (("predict*"[Title/Abstract] OR "predict* model*"[Title/Abstract] OR "predict* learning*"[Title/Abstract] OR "prognosis"[Title/Abstract] OR "prognostic*"[Title/Abstract] OR "clinical prediction"[Title/Abstract] OR "clinical decision*"[Title/Abstract] OR "decision rule*"[Title/Abstract] OR "score*"[Title/Abstract] OR "risk*"[Title/Abstract] OR "stratif*"[Title/Abstract] OR "classification*"[Title/Abstract] OR "algorithm*"[Title/Abstract] OR "performance"[Title/Abstract]) OR ("Prediction Algorithms"[Mesh] OR "Prediction Methods, Machine"[Mesh] OR "Predictive Learning Models"[Mesh] OR "Clinical Decision Rules"[Mesh] OR "Prognosis"[Mesh]))) AND ((English[la] OR French[la])) | **1183** |

1. **Database: Embase (Embase.com)**

**Date of search:** From inception to July 9th, 2025

**Database limit:** English and French

|  | **# Search** | **Search strategy** | **Results** |
| --- | --- | --- | --- |
| **Concept artificial intelligence/ machine learning/ deep learning** |  |  |  |
| Free vocabulary (title and abstract field) | #1 | 'artificial intelligence':ab,ti OR 'artificial general intelligence':ab,ti OR 'artificial learning':ab,ti OR (artificial:ab,ti AND intelligence:ab,ti) OR 'machine learning':ab,ti OR 'machine intelligence':ab,ti OR (machine:ab,ti AND learning:ab,ti) OR 'deep learning':ab,ti OR 'supervised learning':ab,ti OR 'unsupervised learning':ab,ti OR 'semi-supervised learning':ab,ti OR 'reinforcement learning':ab,ti OR 'ensemble learning':ab,ti OR 'statistical learning':ab,ti OR 'computational intelligence':ab,ti OR 'automated reasoning':ab,ti OR 'computer reasoning':ab,ti OR 'intelligent computation':ab,ti OR 'fuzzy logic':ab,ti OR 'data mining':ab,ti OR 'data science':ab,ti OR 'learning from labeled data':ab,ti OR 'natural language processing':ab,ti OR 'large language model*':ab,ti OR genai:ab,ti | 335,444 |
| Controlled vocabulary | #2 | 'machine learning algorithm'/exp OR 'machine learning'/exp OR 'artificial intelligence'/exp | 670,843 |
| Free and controlled vocabulary | #3 | #1 OR #2 | 724,597 |
| **Concept emergency department/ triage** |  |  |  |
| Free vocabulary (title and abstract field) | #4 | 'emergency department*':ab,ti OR 'emergency room*':ab,ti OR 'emergency service*':ab,ti OR 'hospital emergency':ab,ti OR 'emergency hospital service*':ab,ti OR 'emergency ward*':ab,ti OR 'emergency unit*':ab,ti OR 'emergency outpatient*':ab,ti OR (accident:ab,ti AND 'emergency department*':ab,ti) OR 'service emergency':ab,ti OR 'emergency medicine':ab,ti OR 'emergency medical service*':ab,ti OR 'emergency health service*':ab,ti OR emergenc*:ab,ti OR triage:ab,ti | 836,263 |
| Controlled vocabulary | #5 | 'emergency health service'/exp OR 'emergency medicine'/exp OR 'hospital emergency service'/exp OR 'emergency department visit'/exp OR 'patient triage'/exp | 426,703 |
| Free and controlled vocabulary | #6 | #4 OR #5 | 959,457 |
| **Concept respiratory tract infections** |  |  |  |
| Free vocabulary (title and abstract field) | #7 | 'respiratory infection*':ab,ti OR 'acute respiratory infection*':ab,ti OR 'respiratory tract infection*':ab,ti OR 'acute respiratory tract infection*':ab,ti OR 'respiratory symptom*':ab,ti OR 'respiratory infection symptom*':ab,ti OR (respiratory:ab,ti AND infection:ab,ti) OR influenza:ab,ti OR flu:ab,ti OR 'influenza-like illness':ab,ti OR 'influenza-like symptom*':ab,ti OR 'flu-like illness':ab,ti OR 'flu-like symptom*':ab,ti OR 'respiratory virus*':ab,ti OR parainfluenza*:ab,ti OR enterovirus*:ab,ti OR rhinovirus*:ab,ti OR 'rhino/enterovirus*':ab,ti OR 'entero rhinovirus*':ab,ti OR 'entero-/rhinovirus*':ab,ti OR adenovirus*:ab,ti OR 'respiratory syncytial virus*':ab,ti OR 'human metapneumovirus*':ab,ti OR coronavirus*:ab,ti OR 'covid 19':ab,ti OR 'sars cov 2':ab,ti OR 'severe acute respiratory syndrome':ab,ti OR pneumonia:ab,ti | 1,145,461 |
| Controlled vocabulary | #8 | 'respiratory tract infection'/exp OR 'Paramyxovirinae'/exp OR 'Enterovirus'/exp OR 'Enterovirus infection'/exp OR 'Human rhinovirus'/exp OR 'Rhinovirus infection'/exp OR 'Adenoviridae'/exp OR 'human adenovirus infection'/exp OR 'Human respiratory syncytial virus'/exp OR 'Human metapneumovirus infection'/exp OR 'Coronavirinae'/exp OR 'Coronavirus infection'/exp | 1,247,810 |
| Free and controlled vocabulary | #9 | #7 OR #8 | 1,619,898 |
| **Concept prediction model, clinical decision, risk** |  |  |  |
| Free vocabulary (title and abstract field) | #10 | predict*:ab,ti OR 'predict* model*':ab,ti OR 'predict* learning':ab,ti OR prognosis:ab,ti OR prognostic*:ab,ti OR 'clinical prediction':ab,ti OR 'clinical decision*':ab,ti OR 'decision rule*':ab,ti OR score*:ab,ti OR risk*:ab,ti OR stratif*:ab,ti OR classification*:ab,ti OR algorithm*:ab,ti OR performance*:ab,ti | 11,472,078 |
| Controlled vocabulary | #11 | 'prediction algorithm'/exp OR 'predictive model'/exp OR 'clinical decision rule'/exp OR 'prognosis'/exp | 1,053,065 |
| Free and controlled vocabulary | #12 | #10 OR #11 | 11,667,773 |
| **All concepts combined** | #13 | #3 AND #6 AND #9 AND #12 | **1792** |
| **Language filter** |  |  |  |
| Only English and French | # 13 AND ([english]/lim OR [french]/lim) |  | **1779** |

1. **Database: Web of Science**

**Date of search:** From inception to July 9th, 2025

**Database limit:** English and French

|  | **# Search** | **Search strategy** | **Results** |
| --- | --- | --- | --- |
| **Concept artificial intelligence/ machine learning/ deep learning** |  |  |  |
| Free vocabulary (topic) | #1 | TS=("artificial intelligence" OR "artificial general intelligence" OR "artificial learning" OR ("artificial" AND "intelligence") OR "machine learning" OR "machine intelligence" OR ("machine" AND "learning") OR "deep learning" OR "supervised learning" OR "unsupervised learning" OR "semi-supervised learning" OR "reinforcement learning" OR "ensemble learning" OR "statistical learning" OR "computational intelligence" OR "automated reasoning" OR "computer reasoning" OR "intelligent computation" OR "fuzzy logic" OR "data mining" OR "data science" OR "learning from labeled data" OR "natural language processing" OR "large language model*" OR "GenAI") | 1,366,955 |
| **Concept emergency department/ triage** |  |  |  |
| Free vocabulary (topic) | #2 | TS=("emergency department*" OR "emergency room*" OR "emergency service*" OR "hospital emergency" OR "emergency hospital service*" OR "emergency ward*" OR "emergency unit*" OR "emergency outpatient*" OR "accident and emergency department*" OR "service emergency" OR "emergency medicine" OR "emergency medical service*" OR "emergency health service*" OR "emergenc*" OR "triage") | 963,513 |
| **Concept respiratory tract infections** |  |  |  |
| Free vocabulary (topic) | #3 | TS=("respiratory infection*" OR "acute respiratory infection*" OR "respiratory tract infection*" OR "acute respiratory tract infection*" OR "respiratory symptom*" OR "respiratory infection symptom*" OR ("respiratory" AND "infection") OR "influenza" OR "flu" OR "influenza-like illness" OR "influenza-like symptom*" OR "flu-like illness" OR "flu-like symptom*" OR "respiratory virus*" OR "parainfluenza*" OR "enterovirus*" OR "rhinovirus*" OR "rhino/enterovirus*" OR "entero-rhinovirus*" OR "entero-/rhinovirus*" OR "adenovirus*" OR "respiratory syncytial virus*" OR "human metapneumovirus*" OR "coronavirus*" OR "Covid-19" OR "SARS-CoV-2" OR "severe acute respiratory syndrome" OR "pneumonia") | 1,165,791 |
| **Concept prediction model, clinical decision, risk** |  |  |  |
| Free vocabulary (title and abstract field) | #4 | TS=("predict*" OR "predict* model*" OR "predict* learning*" OR "prognosis" OR "prognostic*" OR "clinical prediction" OR "clinical decision*" OR "decision rule*" OR "score*" OR "risk*" OR "stratif*" OR "classification*" OR "algorithm*" OR "performance" ) | 19,860,743 |
| **All concepts combined** |  | #1 AND #2 AND #3 AND #4 | **1577** |
| **Language filter** |  |  |  |
| Only English and French | English and French | (#1 AND #2 AND #3 AND #4) AND (LA==("ENGLISH" OR "FRENCH")) | **1563** |

1. **Database: CINAHL Plus with Full Text**

**Date of search:** From inception to July 9th, 2025

**Database limit:** English and French

|  | **# Search** | **Search strategy** | **Results** |
| --- | --- | --- | --- |
| **Concept artificial intelligence/ machine learning/ deep learning** |  |  |  |
| Free vocabulary (title and abstract field) | S1 | XB ("artificial intelligence" OR "artificial general intelligence" OR "artificial learning" OR ("artificial" AND "intelligence") OR "machine learning" OR "machine intelligence" OR ("machine" AND "learning") OR "deep learning" OR "supervised learning" OR "unsupervised learning" OR "semi-supervised learning" OR "reinforcement learning" OR "ensemble learning" OR "statistical learning" OR "computational intelligence" OR "automated reasoning" OR "computer reasoning" OR "intelligent computation" OR "fuzzy logic" OR "data mining" OR "data science" OR "learning from labeled data" OR "natural language processing" OR "large language model*" OR "GenAI") | 44,323 |
| Controlled vocabulary | S2 | (MH "Artificial Intelligence+") OR (MH "Machine Learning+") OR (MM "Machine Learning Algorithms") | 43,776 |
| Free and controlled vocabulary | S3 | S1 OR S2 | 69,508 |
| **Concept emergency department/ triage** |  |  |  |
| Free vocabulary (title and abstract field) | S4 | XB ("emergency department*" OR "emergency room*" OR "emergency service*" OR "hospital emergency" OR "emergency hospital service*" OR "emergency ward*" OR "emergency unit*" OR "emergency outpatient*" OR "accident and emergency department*" OR "service emergency" OR "emergency medicine" OR "emergency medical service*" OR "emergency health service*" OR "emergenc*" OR "triage") | 191,314 |
| Controlled vocabulary | S5 | XB ("emergency department*" OR "emergency room*" OR "emergency service*" OR "hospital emergency" OR "emergency hospital service*" OR "emergency ward*" OR "emergency unit*" OR "emergency outpatient*" OR "accident and emergency department*" OR "service emergency" OR "emergency medicine" OR "emergency medical service*" OR "emergency health service*" OR "emergenc*" OR "triage") | 128,896 |
| Free and controlled vocabulary | S6 | S4 OR S5 | 252,241 |
| **Concept respiratory tract infections** |  |  |  |
| Free vocabulary (title and abstract field) | S7 | XB ("respiratory infection*" OR "acute respiratory infection*" OR "respiratory tract infection*" OR "acute respiratory tract infection*" OR "respiratory symptom*" OR "respiratory infection symptom*" OR ("respiratory" AND "infection") OR "influenza" OR "flu" OR "influenza-like illness" OR "influenza-like symptom*" OR "flu-like illness" OR "flu-like symptom*" OR "respiratory virus*" OR "parainfluenza*" OR "enterovirus*" OR "rhinovirus*" OR "rhino/enterovirus*" OR "entero-rhinovirus*" OR "entero-/rhinovirus*" OR "adenovirus*" OR "respiratory syncytial virus*" OR "human metapneumovirus*" OR "coronavirus*" OR "Covid-19" OR "SARS-CoV-2" OR "severe acute respiratory syndrome" OR "pneumonia") | 226,763 |
| Controlled vocabulary | S8 | (MH "Respiratory Tract Infections+") OR (MH "Paramyxoviruses+") OR (MH "Enterovirus Infections+") OR (MM "Adenoviruses") OR (MM "Respiratory Syncytial Virus Infections") OR (MH "Coronavirus+") OR (MH "Coronavirus Infections+") | 150,594 |
| Free and controlled vocabulary | S9 | S7 OR S8 | 289,662 |
| Concepts 1 to 3 combined* | S10 | S3 AND S6 AND S9 | 221 |
| Language filter |  |  |  |
| Only English and French | # 13 + narrow by French and English |  | 218 |

*Note: The 4th concept (prediction model, clinical decision, risk) was omitted here to avoid the risk of missing important articles as the database contains less articles

1. **Database: Cochrane Library**

**Date of search:** From inception to July 9th, 2025

**Database limit:** Results limited to clinical trials

|  | **# Search** | **Search strategy** | **Results** |
| --- | --- | --- | --- |
| **Concept artificial intelligence/ machine learning/ deep learning** |  |  |  |
| Free vocabulary (title and abstract field) | #1 | ("artificial intelligence"):ti,ab,kw OR ("artificial general intelligence"):ti,ab,kw OR ("artificial learning"):ti,ab,kw OR (("artificial" AND "intelligence")):ti,ab,kw OR ("machine learning"):ti,ab,kw OR ("machine intelligence"):ti,ab,kw OR (("machine" AND "intelligence")):ti,ab,kw OR ("deep learning"):ti,ab,kw OR ("supervised learning"):ti,ab,kw OR ("unsupervised learning"):ti,ab,kw OR ("semi-supervised learning"):ti,ab,kw OR ("reinforcement learning"):ti,ab,kw OR ("ensemble learning"):ti,ab,kw OR ("statistical learning"):ti,ab,kw OR ("computational intelligence"):ti,ab,kw OR ("automated reasoning"):ti,ab,kw OR ("computer reasoning"):ti,ab,kw OR ("intelligent computation"):ti,ab,kw OR ("fuzzy logic"):ti,ab,kw OR ("data mining"):ti,ab,kw OR ("data science"):ti,ab,kw OR ("learning from labeled data"):ti,ab,kw OR ("natural language processing"):ti,ab,kw OR ("large language model"):ti,ab,kw OR ("large language models"):ti,ab,kw OR ("GenAI"):ti,ab,kw | 7769 |
| Controlled vocabulary | #2 | [mh "Artificial Intelligence"] OR [mh "Machine Learning"] OR [mh "Machine Learning Algorithms"] | 3596 |
| Free and controlled vocabulary | #3 | #1 OR #2 | 9300 |
| **Concept emergency department/ triage** |  |  |  |
| Free vocabulary (title and abstract field) | #4 | ("emergency department"):ti,ab,kw OR ("emergency departments"):ti,ab,kw OR ("emergency room"):ti,ab,kw OR ("emergency rooms"):ti,ab,kw OR ("emergency service"):ti,ab,kw OR ("emergency services"):ti,ab,kw OR ("hospital emergency"):ti,ab,kw OR ("emergency hospital service"):ti,ab,kw OR ("emergency ward"):ti,ab,kw OR ("emergency wards"):ti,ab,kw OR ("emergency unit"):ti,ab,kw OR ("emergency units"):ti,ab,kw OR ("emergency outpatient"):ti,ab,kw OR ("emergency outpatients"):ti,ab,kw OR ("accident and emergency department"):ti,ab,kw OR ("accident and emergency departments"):ti,ab,kw OR ("service emergency"):ti,ab,kw OR ("emergency medicine"):ti,ab,kw OR ("emergency medical service"):ti,ab,kw OR ("emergency medical services"):ti,ab,kw OR ("emergency health service"):ti,ab,kw OR ("emergency health services"):ti,ab,kw OR ("emergenc"):ti,ab,kw OR ("emergencies"):ti,ab,kw OR ("triage"):ti,ab,kw | 38630 |
| Controlled vocabulary | #5 | [mh "Emergency Medicine"] OR [mh "Emergency Service, Hospital"] OR [mh "Emergency Medical Services"] OR [mh "Emergency Room Visits"] OR [mh "Triage"] | 6456 |
| Free and controlled vocabulary | #6 | #4 OR #5 | 38900 |
| **Concept respiratory tract infections** |  |  |  |
| Free vocabulary (title and abstract field) | #7 | ("respiratory infection"):ti,ab,kw OR ("respiratory infections"):ti,ab,kw OR ("acute respiratory infection"):ti,ab,kw OR ("acute respiratory infections"):ti,ab,kw OR ("respiratory tract infection"):ti,ab,kw OR ("respiratory tract infections"):ti,ab,kw OR ("acute respiratory tract infection"):ti,ab,kw OR ("acute respiratory tract infections"):ti,ab,kw OR ("respiratory symptom"):ti,ab,kw OR ("respiratory symptoms"):ti,ab,kw OR ("respiratory infection symptom"):ti,ab,kw OR ("respiratory infection symptoms"):ti,ab,kw OR ("respiratory" AND "infection"):ti,ab,kw OR ("influenza"):ti,ab,kw OR ("flu"):ti,ab,kw OR ("influenza-like illness"):ti,ab,kw OR ("influenza-like symptom"):ti,ab,kw OR ("influenza-like symptoms"):ti,ab,kw OR ("flu-like illness"):ti,ab,kw OR ("flu-like symptom"):ti,ab,kw OR ("flu-like symptoms"):ti,ab,kw OR ("respiratory virus"):ti,ab,kw OR ("respiratory viruses"):ti,ab,kw OR ("parainfluenza"):ti,ab,kw OR ("parainfluenzae"):ti,ab,kw OR ("enterovirus"):ti,ab,kw OR ("enteroviruses"):ti,ab,kw OR ("rhinovirus"):ti,ab,kw OR ("rhinoviruses"):ti,ab,kw OR ("rhino/enterovirus"):ti,ab,kw ("rhino/enteroviruses"):ti,ab,kw OR ("entero-rhinovirus"):ti,ab,kw OR ("entero-rhinoviruses"):ti,ab,kw OR ("entero-/rhinovirus"):ti,ab,kw OR ("entero-/rhinoviruses"):ti,ab,kw OR ("adenovirus"):ti,ab,kw OR ("adenoviruses"):ti,ab,kw OR ("respiratory syncytial virus"):ti,ab,kw OR ("respiratory syncytial viruses"):ti,ab,kw OR ("human metapneumovirus"):ti,ab,kw OR ("human metapneumoviruses"):ti,ab,kw OR ("coronavirus"):ti,ab,kw OR ("coronaviruses"):ti,ab,kw OR ("covid 19"):ti,ab,kw OR ("sars cov 2"):ti,ab,kw OR ("severe acute respiratory syndrome"):ti,ab,kw OR ("pneumonia"):ti,ab,kw | 68900 |
| Controlled vocabulary | #8 | [mh "Respiratory Tract Infections"] OR [mh "Parainfluenza Virus 1, Human"] OR [mh "Parainfluenza Virus 2, Human"] OR [mh "Parainfluenza Virus 3, Human"] OR [mh "Parainfluenza Virus 4, Human"] OR [mh "Enterovirus"] OR [mh "Enterovirus Infections"] OR [mh "Rhinovirus"] OR [mh "Adenovirus Infections, Human"] OR [mh "Adenoviruses, Human"] OR [mh "Respiratory Syncytial Virus Infections"] OR [mh "Respiratory Syncytial Virus, Human"] OR [mh "Metapneumovirus"] OR [mh "Coronavirus"] OR [mh "Coronavirus Infections"] | 31078 |
| Free and controlled vocabulary | #9 | #7 OR #8 | 78357 |
| Concepts 1 to 3 combined* | #10 | #3 AND #6 AND #9 | 30 |

*Note: The 4th concept (prediction model, clinical decision, risk) was omitted here to avoid the risk of missing important articles as the database contains less articles

**Table S3: Detailed characteristics of included studies (n=52)**

| **Author, Year, Journal** | **Study title** | **Study data origin** | **Study recruitment period** | **Study design** | **Single or multicentre, number** | **Type of acute respiratory infection** | **Total sample size included in analysis (for training and testing or as specified)** | **Age, sex and gender, distribution, and racial/ethnic composition** |
| --- | --- | --- | --- | --- | --- | --- | --- | --- |
| Tan *et al*., 2021, BMC Geriatrics [29] | Predicting outcomes in older ED patients with influenza in real time using a big data-driven and machine learning approach to the hospital information system | Taiwan | Jan 2009 to Dec 2018 | Retrospective | Multicentre  (Chi Mei)  (n=3) | Influenza  (ICD-9-CM 487–488, or Oseltamivir/Peramivir/Relenza at index ED visit) | 5,508 | Age (years):  ◦Mean (SD): 76.6 (7.4)  Male: 49.33%; female: 50.67%  Race/ethnicity: NS |
| Yu *et al*., 2021, PLOS ONE  [30] | Machine learning methods to predict mechanical ventilation and mortality in patients with COVID-19 | United States | Feb-May 2020:  **◦**Feb-Apr 2020  (training/test cohort)  **◦**Apr-May 2020  (prospective validation cohort) | Retrospective | Multicentre  (Beaumont Health, Michigan)  (n=8) | COVID-19  (confirmed) | 1,980  (1,306 ED visits Feb-Apr 2020; 674 ED visits Apr-May 6 2020 for COVID-19-related symptoms) | *For the mechanical ventilation outcome*  Age (years):  ◦Mean (SD): 63.2 (17.1)  Male: 51.2%; female: 48.8%  Race:  ◦Asian: 1.6%  ◦African American: 56.4%  ◦Caucasian: 36.6%  ◦Other: 5.1% |
| Wong *et al*., 2020, Antimicrobial Resistance and Infection Control  [31] | Risk prediction models to guide antibiotic prescribing: a study on adult patients with uncomplicated upper respiratory tract infections in an emergency department | Singapore | Jun 2016 to Nov 2018 | Retrospective (NS) | Single centre | Uncomplicated upper respiratory tract infection  (ICD-10-AM J00–J06)(Note: Multiplex PCR panel tested: adenovirus, bocavirus 1/2/3/4, coronaviruses 229E/NL63/OC43, enterovirus, influenza A/B, metapneumovirus, parainfluenza 1–4, RSV A/B, rhinovirus) | 715 | Age (years):  ◦Median (IQR): 36 (28-51)  Male: 61.3%  Race/ethnicity:  *Antibiotics recommended group*  ◦Chinese: 43.7%  ◦Malay: 15.7%  ◦Indian: 22.0%  ◦Other: 18.6%  *Antibiotics not recommended group*  ◦Chinese: 42.7%  ◦Malay: 21.3%  ◦Indian: 16.0%  ◦Other: 20.0% |
| Walsh *et al*., 2004, European Journal of Emergency Medicine  [32] | An artificial neural network ensemble to predict disposition and length of stay in children presenting with bronchiolitis | Ireland  (Note: information derived from an article cited in the study.) | 1999 | Retrospective | Multicentre  (n=2)  (Note: information derived from an article cited in the study.) | Bronchiolitis  (diagnosed) | 119 | Age group:  ◦≤2 years  Sex distribution: NS  Race/ethnicity: NS |
| Walsh *et al*., 2015, Pediatrics  [33] | Derivation of candidate clinical decision rules to identify infants at risk for central apnea | United States | Nov 2005 to May 2012 | Prospective | Single centre | Bronchiolitis and/or central apnea | 990 ED visits  (by 892 patients) | Age (months):  ◦Median (IQR): 2.36 (1.32-4.00)  Boys: 58%  Race/ethnicity: NS |
| Subudhi *et al*., 2021, NPJ Digital Medicine  [34] | Comparing machine learning algorithms for predicting ICU admission and mortality in COVID-19 | United States | Mar-Apr 2020  (development/internal validation)  May-Aug 2020  (temporal validation) | Retrospective (NS) | Multicentre  (Massachusetts General Brigham multi-hospital database)  (n=14) | COVID-19  (positive) | 3,597  (model development population)  1,711  (temporal validation population) | *Model development population*  Age (years):  ◦Median: 55 years  Women: 48.7%  Race:  Information not found, the race distribution is reported to be similar to that of the temporal validation dataset  *Temporal validation population*  Age groups:  ◦0-9 to 90+ years  Male: 52.5%  Race:  ◦Other: 83.9% vs African American |
| Shamout *et al*., 2021, NPJ Digital Medicine  [35] | An artificial intelligence system for predicting the deterioration of COVID-19 patients in the emergency department | United States | Mar-May 2020 | Retrospective | Single centre | COVID-19  (positive) | 3,661 patients (6,449 images | *Training set*  Age (years):  ◦Mean (SD): 61.9 (17.6)  Female: 41.0%  Race/ethnicity: NS  *Test set*  Age (years):  ◦Mean (SD): 64.7 (17.4)  Female: 42.5%  Race/ethnicity: NS |
| Ortiz-Barrios *et al*., 2023, Journal of Business Research  [36] | Artificial intelligence and discrete-event simulation for capacity management of intensive care units during the Covid-19 pandemic: A case study | Spain | Feb 2020 to Feb 2021 | Retrospective (NS) | Multicentre  (Spanish hospital chain)  (number of centres not specified) | COVID-19  (diagnosed, positive) | 1,049 | Age groups:  ◦0-10 to 100+ years  Male 64%; female 36% (calculated)  Race/ethnicity: NS |
| Nicora *et al*., 2024, Journal of Imaging  [37] | Bayesian Networks in the Management of Hospital Admissions: A Comparison between Explainable AI and Black Box AI during the Pandemic | Italy | Mar-May 2020  (1st COVID-19 wave)  Mar-May 2021  (3rd COVID-19 wave, independent test validation) | Retrospective | Single centre | COVID-19  (diagnosed) | 660  (1st wave)  462  (3rd wave, independent validation) | *1st wave*  Age (years):  ◦Mean (SD): 66.2 (15)  Men: 67%; women: 33%  Race/ethnicity: NS  *3rd wave, independent validation set*  Age (years):  ◦Mean (SD): 70 (15)  Men: 58%; women 42%  Race/ethnicity: NS |
| Mushtaq *et al*., 2021, European Radiology  [38] | Initial chest radiographs and artificial intelligence (AI) predict clinical outcomes in COVID-19 patients: analysis of 697 Italian patients | Italy | Feb-Apr 2020 | Retrospective | Single centre | COVID-19  (positive) | 697 | Age (years):  ◦Median (IQR): 62 (52-75)  Male: 66.7%; female: 33.3%  Race/ethnicity: NS |
| Morís *et al*., 2024, Heliyon  [39] | Efficient clinical decision-making process via AI-based multimodal data fusion: A COVID-19 case study | Spain | NS | Retrospective | Single centre | COVID-19  (positive) | 2,040 | Age groups:  ◦<65 years: 42.16%  ◦65-80 years: 35.25%  ◦>80 years: 22.60%  Male: 56.62%; female: 43.38%  Race/ethnicity: NS |
| Montoro *et al*., 2023, Egyptian Journal of Radiology and Nuclear Medicine  [40] | Quantification of pulmonary opacities using artificial intelligence in chest CT scans during SARS-CoV-2 pandemic: validation and prognostic assessment | Spain | Aug-Sep 2021 | Prospective (NS)  Observational, analytical and longitudinal | Single centre | COVID-19  (suspected COVID-19 pneumonia) | 304 | Age (years):  ◦Mean (SD): 68 (19)  ◦Range: 22-90  Male: 52.6%; female: 47.3%  Race/ethnicity: NS |
| Logaras *et al*., 2022, JMIR Formative Research  [41] | Risk Assessment of COVID-19 Cases in Emergency Departments and Clinics With the Use of Real-World Data and Artificial Intelligence: Observational Study | Greece | Sep 2021 to Jan 2022 | Prospective (NS) | Single centre | COVID-19  (confirmed) | 157 | Age (years):  ◦Mean (SD): 52.8 (19.6)  Male: 56.1%  Race/ethnicity: NS |
| Lin *et al*., 2024, BMC Medical Informatics and Decision Making  [42] | Enhancing pneumonia prognosis in the emergency department: a novel machine learning approach using complete blood count and differential leukocyte count combined with CURB-65 score | Taiwan | Jan 2019 to Dec 2021 | Retrospective | Single centre | Pneumonia  (diagnosed) | 9,352 | Age (years):  ◦Mean (SD): 63.0 (26.0)  Male: 62.5%  Race/ethnicity: NS |
| Kwon *et al*., 2021, Radiology: Artificial Intelligence  [43] | Combining Initial Radiographs and Clinical Variables Improves Deep Learning Prognostication in Patients with COVID-19 from the Emergency Department | United States | Mar 10-29, 2020:  **◦**Mar 10-26, 2020  (training/validation)  **◦**Mar 27-29, 2020  (hold-out test) | Retrospective | Multicentre  (New York City urban health system)  (n=3) | COVID-19  (positive) | 499:  ◦338  (training/validation)  ◦161  (hold out test) | *Overall*  Age (years):  ◦Mean (IQR): 42 (34-50)  Men: 62%  Race:  ◦White: 20%  ◦Asian: 9%  ◦Black: 23%  ◦Hispanic: 32%  ◦Other/unknown: 16% |
| Kim *et al*., 2023, American Journal of Roentgenology  [44] | A Deep Learning Model Using Chest Radiographs for Prediction of 30-Day Mortality in Patients With Community-Acquired Pneumonia: Development and External Validation | South Korea | Mar 2013 to Dec 2019  (development)  Jan-Mar 2020  (temporal test cohort)  Jan-Dec 2020  (external test cohort A)  Mar 2019 to Oct 2021  (external test cohort B) | Retrospective | Single centre  (development) | Community-acquired pneumonia  (clinically diagnosed) | 7,105  (development cohort)  947  (temporal test cohort)  467  (external test cohort A)  381  (external test cohort B) | *Development cohort (overall)*  Age (years):  ◦Mean (SD): 73 (15)  Male/men: 62.2%; female/women: 37.8%  Race/ethnicity: NS  *Temporal test cohort*  Age (years):  ◦Mean (SD): 71 (14)  Male: 63%; female: 37%  Race/ethnicity: NS  *External test cohort A*  Age (years):  ◦Mean (SD): 73 (15)  Male: 63%; female: 37%  Race/ethnicity: NS  *External test cohort B*  Age (years):  ◦Mean (SD): 71 (14)  Male: 64%; female: 36%  Race/ethnicity: NS |
| Kang *et al*., 2020, Clinical and Experimental Emergency Medicine  [45] | Predicting 30-day mortality of patients with pneumonia in an emergency department setting using machine-learning models | South Korea | Jan 2016 to Dec 2017 | Retrospective | Single centre | Pneumonia  (diagnosed) | 1,732 patients | Age (years):  ◦Median (IQR): 68 (58-77)  Male: 62.9%  Race/ethnicity: NS |
| Jones *et al*., 2023, Academic Emergency Medicine  [46] | Hospital admission decisions for older Veterans with community‐onset pneumonia: An analysis of 118 U.S. Veterans Affairs Medical Centers | United States | Jan 2006 to Dec 2016 | Retrospective | Multicentre  (Veterans Affairs Medical Centers)  (n=118) | Community-onset pneumonia  (diagnosed) | 297,498 encounters | Age (years):  ◦Median (IQR): 68 (60-79)  Male: 95%  Race/ethnicity: NS |
| Jones *et al*., 2021, Annals of the American Thoracic Society  [47] | Computerized mortality prediction for community-acquired pneumonia at 117 Veterans Affairs Medical Centers | United States | Jan 2006 to Dec 2016:  **◦**Jan 2006 to Dec 2014  (model derivation)  **◦**Jan 2015 to Dec 2016  (validation cohort) | Retrospective | Multicentre  (Veterans Affairs Medical Centers)  (n=117) | Community-acquired pneumonia  (diagnosed) | 297,498 ED visits  (initial pneumonia diagnosis in 249,048 patients):  ◦230,470  (derivation population)  ◦67,028  (validation population) | Age (years):  ◦Median (IQR): 68 (60-79)  Male: 95%  Race/ethnicity: NS  (Note: subgroup analysis for self-identified patients of Black race) |
| Ji *et al*., 2023, Proceedings of the IEEE International Conference on Healthcare Informatics  [48] | Prediction of COVID-19 Patients' Emergency Room Revisit using Multi-Source Transfer Learning | United States | Mar 2020 to Jan 2021  (Note: training encounters occurred earlier than testing encounters.) | Retrospective (NS) | Multicentre  (all affiliated with the University of Pittsburgh Medical Center)  (n=13) | COVID-19  (active infections) | 3,210 emergency room encounters | Age: NS  Sex/gender: NS  Race/ethnicity: NS |
| Jhaveri *et al*., 2025, Canadian Association of Radiologists Journal  [49] | Prospective External Validation of an AI-Based Emergency Department Pneumonia Disposition Prediction Tool | Canada | Nov 2020 to Jun 2021  (retrospective cohort)  Jan 2023  (prospective cohort) | Retrospective and prospective external validation of an AI model | Multicentre  (single hospital system)  (n=2) | Suspected community-acquired pneumonia | 17,689  (retrospective)  3,062  (prospective) | *Retrospective*  Age (years):  ◦Median (range): 62 (18-105)  Male: 50.7%; female: 49.3%  Race/ethnicity: NS  *Prospective*  Age (years):  ◦Median (range): 67 (19-104)  Male: 50.2%; female 49.8%  (with an unknown: 1/3062)  Race/ethnicity: NS |
| Husain *et al*., 2022, European Respiratory Journal  [50] | A biomarker assay to risk-stratify patients with symptoms of respiratory tract infection | Canada  (development/training)  Italy  (external validation)  Brazil  (external validation) | Apr-Oct 2020  (Canada cohort and an additional set of patients who tested positive for COVID-19 between Nov-Dec 2020)  Apr-May 2020  (Italy cohort)  Jan-Mar 2021  (Brazil cohort) | Prospective | Multicentre  (University Health Network ED)  (number of centres not specified) | Respiratory illness symptoms  (Note: subgroup analysis in confirmed community-acquired or COVID-19 pneumonia) | 310  (Canada, development/training)  131  (Italy, external validation)  200  (Brazil, external validation) | *Canada cohort*  Age (years):  ◦Mean (SD): 55 (18)  Male: 58%  Race/ethnicity:  ◦White/Caucasian: 57%  ◦Black: 7%  ◦South Asian: 5%  ◦East Asian: 4%  ◦Hispanic/Latino: 3%  *Italy external validation cohort*  Age (years):  Mean (SD): 60 (20)  Male: 42%  Race/ethnicity: NS  *Brazil external validation cohort*  Age (years):  ◦Mean (SD): 48 (18)  Male: 47%  Race/ethnicity: NS |
| Hinson *et al*., 2024, JACEP Open  [51] | Multisite development and validation of machine learning models to predict severe outcomes and guide decision-making for emergency department patients with influenza | United States | Jan 2017 to May 2022:  Two approaches to model validation: temporal and spatial  **◦**Jan 2017 to Dec 2019  (temporal validation:  derivation cohort using ED encounters)  **◦**Dec 2019 and May 2022  (temporal validation:  validation cohort using ED encounters)  (Note: for spatial validation, the dataset was divided based on site of care) | Retrospective | Multicentre  (single health system)  (n=5) | Influenza  (positive) | 8,032 patients:  -Temporal validation:  ◦5,352  (derivation cohort)  ◦2,680  (validation cohort)  -Spatial validation:  ◦5,087  (derivation cohort)  ◦2945  (validation cohort) | *Overall*  Age groups:  ◦18-44 to >74 years  Female: 57.4%  Race/ethnicity:  ◦Black non-Latino: 38.5%  ◦White non-Latino: 39.3%  ◦Latino: 11.3%  ◦Other: 10.9%  *Temporal validation (derivation cohort)*  Age groups:  ◦18-44 to 74+ years  Female: 57.5%  Race/ethnicity:  ◦Black non-Latino: 36.4%  ◦White non-Latino: 43.1%  ◦Latino: 9.4%  ◦Other: 11.1%  *Temporal validation (validation cohort)*  Age groups:  ◦18-44 to >74 years  Female: 57.4%  Race/ethnicity:  ◦Black non-Latino: 42.8%  ◦White non-Latino: 31.6%  ◦Latino: 15.2%  ◦Other: 10.4%  *Spatial validation (derivation cohort)*  Age groups:  ◦18-44 to >74 years  Female: 58.0%  Race/ethnicity:  ◦Black non-Latino: 46.1%  ◦White non-Latino: 33.9%  ◦Latino: 8.7%  ◦Other:11.3%  *Spatial validation (validation cohort)*  Age groups:  ◦18-44 to 74+ years  Female: 56.5%  Race/ethnicity:  ◦Black non-Latino: 25.4%  ◦White non-Latino:48.5%  ◦Latino:15.9%  ◦Other: 10.2% |
| Hinson *et al*., 2022, NPJ Digital Medicine  [52] | Multisite implementation of a workflow-integrated machine learning system to optimize COVID-19 hospital admission decisions | United States | Mar-Nov 2020  (retrospective model)  Nov 2020 to Jul 2021  (prospective validation) | Retrospective and prospective | Multicentre  (single health system)  (n=5) | COVID-19  (suspected) | 21,452 ED encounters  (18,810 unique patients; retrospective cohort)  15,670 ED encounters  (14,103 unique patients; prospective validation cohort):  ◦4,322 ED visits  (silent validation)  ◦11,348 ED visits  (visible validation) | *Retrospective derivation*  Age groups:  ◦18-44 to >74 years  Female: 52.3%  Race/ethnicity:  ◦Black non-Latino: 37.6%  ◦White non-Latino: 38.7%  ◦Latino: 15.3%  ◦Other: 8.5%  *Retrospective validation*  Age groups:  ◦18-44 to >74 years  Female: 53.2%  Race/ethnicity:  ◦Black non-Latino: 37.9%  ◦White non-Latino: 38.0%  ◦Latino:15.8%  ◦Other: 8.3%  *Prospective silent*  Age groups:  ◦18-44 to >74 years  Female: 54.6%  Race/ethnicity:  ◦Black non-Latino: 30.8%  ◦White non-Latino: 43.7%  ◦Latino:13.0%  ◦Other: 12.5%  *Prospective visible*  Age group:  ◦18-44 to >74 years  Female: 54.3%  Race/ethnicity:  ◦Black non-Latino: 43.7%  ◦White non-Latino: 38.3%  ◦Latino: 8.5%  ◦Other: 9.5% |
| Henriksson *et al*., 2023, Artificial Intelligence in Medicine  [53] | Multimodal fine-tuning of clinical language models for predicting COVID-19 outcomes | Sweden | Mar 2020 to Jan 2022 | Retrospective (NS) | Multicentre  (n=6) | COVID-19  (positive) | 20,149 ED encounters | Age: ≥18 years  Male: 53.6%, female: 46.3% (calculated)  Race/ethnicity: NS  (only region of birth provided: Africa: 4.7%, America: 4.2%, Asia and Oceania: 22.8%, Europe: 13.4%, Sweden:55.0% – calculated) |
| Garrido *et al*., 2025, International Journal of Molecular Sciences  [54] | Role of Artificial Intelligence in Identifying Vital Biomarkers with Greater Precision in Emergency Departments During Emerging Pandemics | Spain | Mar-Apr 2020 | Retrospective (NS) | Single centre | COVID-19  (positive) | 708 | Age: >18 years  Sex/gender: NS  Race/ethnicity: NS |
| Garrido *et al*., 2024, Biomimetics  [55] | Innovation through Artificial Intelligence in Triage Systems for Resource Optimization in Future Pandemics | Spain | Mar-Apr 2020 | Retrospective (NS) | Single centre | COVID-19  (positive) | 708 | Age: >18 years  Male: 37.19%  Race/ethnicity: NS |
| Fuller *et al*.,2023, PLOS Digital Health  [56] | Training and testing of a gradient boosted machine learning model to predict adverse outcome in patients presenting to emergency departments with suspected covid-19 infection in a middle-income setting | Western Cape, South Africa  (development/training)  Western Cape, South Africa  (temporal validation)  United Kingdom  (external validation)  Sudan  (external validation) | Aug 2020 to Oct 2021  (development/training, South Africa)  Nov 2021 to Mar 2022  (temporal validation, Western Cape, South Africa)  Mar-May 2020  (UK external validation)  Jan 2020 to Dec 2021  (Sudan external validation) | Retrospective | Multicentre  (urban Cape Town metropole district plus one large peri-rural hospital)  (n=7)  UK external validation  (EDs across 53 sites)  (n=70)  -Sudan external validation  (government referral hospitals)  (n=2) | COVID-19  (confirmed or suspected) | 282,051  (development/training cohort – Western Cape, South Africa)  130,407  (temporal validation – Western Cape, South Africa)  18,960  (UK external validation)  1,290  (Sudan external validation)  (Note: numbers provided are for complete cases) | *Development/training cohort* – *Western Cape, South Africa*  Age (years):  ◦Mean (SD): 43.7 (17.3)  ◦Median (IQR): 41(29-57)  ◦Range: 16-110  Male: 51.7%; female: 48.3%  Race/ethnicity: NS  (Note: numbers provided are based on the total of 305,564, including incomplete cases)  *Temporal validation – Western Cape, South Africa*  Age (years):  ◦Mean (SD): 43.3 (17.2)  ◦Median (IQR): 41 (29, 56)  ◦Range:16-110  Male: 51%; female 49%  Race/ethnicity: NS  (Note: numbers provided are based on the total of 140,520, including incomplete cases)  *UK external validation cohort*  Age groups:  ◦16-49 to >80years  Male: 49.3%; female: 50.7%  Race/ethnicity: NS  (Note: numbers provided are based on the total of 20,698 including incomplete cases)  Sudan external validation - Sudan cohort  Age (years):  ◦Mean (SD): 63.8 (14)  ◦Median (IQR): 65 (55)  ◦Range: 16-100  Male: 64.8%; female: 35.2%  Race/ethnicity: NS  (Note: numbers provided are based on the total of 2,583, including incomplete cases) |
| Fong *et al*., 2025, American Journal of Emergency Medicine  [57] | Using machine learning to predict emergency department return across two regional health systems; a generalizable model for COVID-19 patients | United States | Apr 2020 to Sep 2022 | Retrospective (NS) | Multicentre  (two health systems)  (n=2) | COVID-19  (diagnosed) | 42,056 ED encounters:  ◦26,454  (health system 1)  ◦16,602  (health system 2) | Age: ≥18 years  Sex/gender: NS  Race/ethnicity: NS |
| Dipaola *et al*., 2023, Scientific reports  [58] | Multimodal deep learning for COVID-19 prognosis prediction in the emergency department: a bi-centric study | Italy | Feb-May 2020 | Retrospective | Multicentre  (Milan area)  (n=2) | COVID-19  (confirmed) | 1,296 | Age (years):  ◦Median (IQR): 63 (52-75)  Male: 64%  Race/ethnicity: NS |
| Di Napoli *et al*., 2023, Journal of Digital imaging  [59] | 3D CT-Inclusive Deep-Learning Model to Predict Mortality, ICU Admittance, and Intubation in COVID-19 Patients | Italy | Mar 2020 to Feb 2021 | Retrospective | Multicentre  (training/testing hospitals)  (n=2)  (external validation hospital)  (n=1) | COVID 19  (confirmed diagnosis) | 761  (model development/testing)  290  (external validation) | *Overall population, including external validation*  Age (years):  ◦Mean (SD): 69 (15)  ◦Range: 22-102  Male: 60.9%; female: 39.1% (calculated)  Race/ethnicity: NS |
| Dayan *et al*., 2021, Nature Medicine  [60] | Federated learning for predicting clinical outcomes in patients with COVID-19 | United States  Japan  Taiwan  South Korea  Thailand  Brazil  Canada  United Kingdom | Dec 2019 to Sep 2020  Mar 2020 to Feb 2021  (independent validation) | Retrospective (NS) | Multicentre  (institutions from 4 continents)  (n=20)  (Massachusetts, USA; independent validation)  (n=3) | COVID-19  (positive and negative) | 16,148  (model training)  840  (independent validation, site 1 – CDH)  399  (independent validation, site 2 – MVH)  264  (independent validation, site 3 – NCH) | Age (years):  ◦Range: 0-100+  Sex/gender: NS  Race/ethnicity: NS |
| Davazdahemami *et al*., 2022, Decision support systems  [61] | An explanatory machine learning framework for studying pandemics: The case of COVID-19 emergency department readmissions | United States | Nov 2019 to Jun 2020 | Retrospective (NS) | Multicentre  (Cerner Health Facts data warehouse)  (number of centres not specified) | COVID-19  (positive) | 7,373 ED visits  (by 6620 patients) | Age (years):  ◦Mean (SD): 45.81 (17.03)  Male: 53.1%; female: 46.7%  (other: 0.02%)  Race:  ◦White: 39.8%  ◦Black: 28.3%  ◦Latino: 19.7%  ◦Other: 12.2% |
| Chung *et al*., 2022, Scientific reports  [62] | Prediction of oxygen requirement in patients with COVID-19 using a pre-trained chest radiograph xAI model: efficient development of auditable risk prediction models via a fine-tuning approach | NS  (unclear if United States or South Korea) | Mar-May 2020 | Retrospective | Single centre | COVID-19  (positive) | 1,740 | Age (years):  ◦Mean (SD): 59.3 (19.3)  ◦Range:16-107  Male: 51.9%; female: 48.1% (calculated)  Race/ethnicity: NS |
| Chen *et al*., 2021, Academic Emergency Medicine  [63] | Real‐time interactive artificial intelligence of things–based prediction for adverse outcomes in adult patients with pneumonia in the emergency department | Taiwan | 2010 to 2019 | Retrospective | Multicentre  (Chi Mei)  (n=3) | Pneumonia  (diagnosed) | 52,626 | Age (years):  ◦Mean (SD): 72.1 (16.3)  Male: 58.3%; female: 41.7%  Race/ethnicity: NS |
| Chamberlin *et al*., 2022, Academic Radiology  [64] | An Interpretable Chest CT Deep Learning Algorithm for Quantification of COVID-19 Lung Disease and Prediction of Inpatient Morbidity and Mortality | United States | Mar 2020 to Feb 2021 | Retrospective | Single centre | COVID-19 pneumonia  (positive and negative) | 241:  ◦93  (COVID-19 positive)  ◦148  (COVID-19 negative) | *COVID-19 positive*  Age (years):  ◦Median (IQR): 59 (45-71)  Male: 61.5%; female: 38.5%  Ethnicity:  ◦Black: 57%  ◦Hispanic: 2.3%  ◦Other: 5.8%  ◦White: 34.9%  *COVID-19 negative*  Age (years):  ◦Median (IQR) 62 (47-69)  Male: 51.9%; female: 48.1%  Ethnicity:  ◦Black: 37.7%  ◦Hispanic: 0%  ◦Other: 1.9%  ◦White: 60.4% |
| Chamberlin *et al*., 2022, BMC infectious diseases  [65] | Automated diagnosis and prognosis of COVID-19 pneumonia from initial ER chest X-rays using deep learning | United States | Jan 2020 to Mar 2021 | Retrospective | Single centre | COVID-19  (possible COVID-19 symptoms) | 2,456:  ◦1000  (COVID-19 positive, training cohort)  ◦1000  (COVID-19 negative, training cohort)  ◦236  (COVID-19 positive, internal hold-out testing cohort)  ◦220  (COVID-19 negative, internal hold-out testing cohort) | *Training cohort, COVID-19 positive*  Age (years):  ◦Median (IQR): 58 (42-71)  Male: 45.3%  Ethnicity:  ◦Asian: 0.9%  ◦Black: 56%  ◦Hispanic: 2.2%  ◦Other: 3.1%  ◦White: 37.7%  *Training cohort, COVID-19 negative*  Age (years):  ◦Median (IQR): 47.5 (34-61.3)  Male: 43.0%  Ethnicity:  ◦Asian: 1.3%  ◦Black: 44.6%  ◦Hispanic: 2.3%  ◦Other: 1.9%  ◦White: 49.8%  *Testing cohort, COVID-19 positive*  Age (years):  ◦Mean (SD): 55.3 (17)  Male: 52.1%; female 47.9%  Ethnicity:  ◦Asian: 0.9%  ◦Black: 47.5%  ◦Hispanic: 7.2%  ◦Other: 3.8%  ◦White: 35.2%  *Testing cohort, COVID-19 negative*  Age (years):  ◦Mean (SD): 49.2 (16.3)  Male: 50.5 %; female: 49.5 %  Ethnicity:  ◦Asian: 0.9%  ◦Black: 45%  ◦Hispanic: 0%  ◦Other: 2.7%  ◦White: 51.4% |
| Cato *et al*., 2024, Journal of the New York State Nurses Association  [66] | A Prognostic Model for COVID-19 Progression to Severe Disease: Discriminating Emergency Department Discharge With the Virus Without Return to the Hospital Within 72 Hours Using Electronic Medical Records | United States | Mar-May 2020 | Retrospective | Multicentre  (single hospital system, Northern Manhattan)  (n=2) | COVID-19  (suspected) | 5,055 ED encounters | Age: 18 to 60+ years  Male: 55.46%; female: 44.54%  Ethnicity:  ◦Hispanic/Latino/Spanish origin: 49.8%  ◦Not Hispanic/Latino/Spanish origin: 28.4%  ◦Unknown: 21.8%  Race:  ◦Black/African American: 23.9%  ◦Multiple races: 33.4%  ◦Other: 1.2%  ◦Unknown: 21.3%  ◦White: 20.2% |
| Catalano *et al*., 2023, European Journal of Radiology Open  [67] | Performance of an AI algorithm during the different phases of the COVID pandemics: what can we learn from the AI and vice versa | Italy | Mar-Apr 2021 | Retrospective | Single centre | COVID-19  (confirmed) | 462 | Age (years):  ◦Mean (SD): 67.7 (15.3)  ◦Range 17-100  Men: 57.6%; women: 42.4%  Race/ethnicity: NS |
| Casiraghi *et al*., 2020, IEEE Access  [68] | Explainable Machine Learning for Early Assessment of COVID-19 Risk Prediction in Emergency Departments | Italy | Mar-Apr 2020 | Retrospective | Multicentre  (ED of an urban multicenter health system)  (number of centres not specified) | COVID-19  (positive) | 301 | Age (years):  ◦Mean (SD): 61 (1)  ◦Range: 23-95  Male: 68.8%; female: 31.2% (calculated)  Race/ethnicity: NS |
| Calvillo-Batllés *et al*., 2022, Radiologià  [69] | Development of severity and mortality prediction models for covid-19 patients at emergency department including the chest x-ray | Spain | Feb-Apr 2020 | Retrospective | Single centre | COVID-19  (positive) | 440 | Age (years):  ◦Median (IQR): 64 (51-79)  ◦Range:17-100  Male: 55.9%; female: 44%  Race/ethnicity: NS |
| Butler *et al*., 2022, International Journal of Medical Informatics  [70] | Image and structured data analysis for prognostication of health outcomes in patients presenting to the ED during the COVID-19 pandemic | United States | Mar-Oct 2020 | Retrospective (NS) | Single centre | COVID 19  (positive and negative) | 3,571 | Age (years):  ◦Mean (SD): 56.23 (20.54)  Male: 53.40%; female: 46.60%  Race:  ◦White: 44.95%  ◦African American: 35.54%  ◦Other: 19.52%  Ethnicity:  ◦Hispanic: 26.44% |
| Beiser *et al*., 2021, JACEP Open  [71] | Predicting 30-day return hospital admissions in patients with COVID-19 discharged from the emergency department: A national retrospective cohort study | United States | Feb-Oct 2020 | Retrospective | Multicentre  (40 hospital systems across 27 US states)  (n=116) | COVID-19  (positive) | 7,529 | Age (years):  ◦Mean (SD): 47.07 (17.3)  ◦Range:18-120  Female: 51.3%  Race/ethnicity:  ◦Hispanic: 29.1%  ◦Non-Hispanic Black: 34.3%  ◦Non-Hispanic White: 18.4%  ◦Unknown/other: 18.2% |
| Bartolucci *et al*., 2021, Scientific reports  [72] | The incremental value of computed tomography of COVID-19 pneumonia in predicting ICU admission | Italy | Mar-Nov 2020:  **◦**Mar-Apr 2020  (training set)  **◦**Aug-Nov 2020  (validation set) | Prospective, observational | Multicentre  (community hospitals, Tuscany region)  (n=2) | COVID-19  (positive) | 115 | *Training set, ICU admission*  Age (years):  ◦Mean (SD): 66 (10)  Male: 63%; female: 37%  Race/ethnicity: NS  *Training set, no ICU admission*  Age (years):  ◦Mean (SD): 68 (12)  Male: 73%; female: 27%  Race/ethnicity: NS  *Validation set, ICU admission*  Age (years):  ◦Mean (SD): 72 (7)  Male: 58%; female: 42%  Race/ethnicity: NS  *Validation set, no ICU admission*  Age (years):  ◦Mean (SD): 61 (3)  Male: 58%; female: 42%  Race/ethnicity: NS |
| Bartenschlager *et al*., 2023, Health Care management Science  [73] | Covid-19 triage in the emergency department 2.0: how analytics and AI transform a human-made algorithm for the prediction of clinical pathways | LEOSS registry  (Lean European Open Survey on COVID-19 patients): 112 European study sites, mainly Germany (98.1%), plus Austria, Belgium, Italy, Switzerland, Latvia, Spain, Bosnia and Herzegovina, and Turkey (based on additional information obtained from the LEOSS study) | Mar 2020 to Jan 2021 | Retrospective | Multicentre  (Europe)  (n=112) | COVID-19  (positive) | 3,543 | Age (years):  ◦Median age category: 56-65  ◦Range: <1 to >85  Male: 59.1%; female: 40.9%  Race/ethnicity: NS |
| Asteris *et al*., 2024, European Journal of Internal Medicine  [74] | Prognosis of COVID-19 severity using DERGA, a novel machine learning algorithm | Greece | May 2020 to Feb 2023 | Retrospective (NS) | Multicentre  (general hospitals, Athens)  (n=2) | COVID-19  (positive) | 1,596 | Age groups:  ◦Adult up to 65 years: 56.1%  ◦>65 years: 43.9%  Male: 58.3%; female: 41.7% (calculated)  Race/ethnicity: NS |
| Ahmed *et al*., 2024, Intelligence-Based Medicine  [75] | Developing a decision model to early predict ICU admission for COVID-19 patients: A machine learning approach | United States | NS | Retrospective | Single centre | COVID-19  (symptoms) | 19,155 | Age: 0 to 100+ years  Male: 42%; female: 58% (calculated)  Race/ethnicity (calculated):  ◦Multiple: 0.1%  ◦White: 54.1%  ◦Black/African American: 38.6%  ◦Asian: 2.4%  ◦American Indian/Alaska Native: ~0.2%  ◦Hispanic or Latino: ~2.3%  ◦Decline/refuse: 2.1%  ◦Other: <1%  ◦Native Hawaiian/Other Pacific Islander: <1%  ◦Unknown: <1%  (Note: information is presented in a box-and-whisker plot, but exact percentages could not be calculated for all racial/ethnic groups) |
| Etu *et al*., 2022, IEEE Access  [76] | Prediction of Length of Stay in the Emergency Department for COVID-19 Patients: A Machine Learning Approach | United States | Mar-Dec 2020:  **◦**Mar-Oct 2020  (training dataset)  **◦**Oct-Dec 2020  (testing dataset) | Retrospective | Single centre | COVID-19  (positive) | 3,301 | Age (years):  ◦Median (IQR): 51 (40-57)  Male: 35.1%; female: 64.9%  Race:  ◦Black/African American: 74.7%  ◦White: 5.5%  ◦Asian: 5.1%  ◦Hispanic: 0.5%  ◦Other: 14.2% |
| van Delft *et al*., 2022, Computing and Informatics  [77] | Using Machine Learning Techniques to Support the Emergency Department | Netherlands | 2019 to 2020 | Retrospective (NS) | Single centre | COVID-19  (Possible coronavirus infection)  (Note: this study was conducted among all emergency room patients, and only a small proportion had COVID-19.) | 1,573 COVID-19 cases | Adults and children  Sex/gender: NS  Race/ethnicity: NS |
| La Salvia *et al*., 2022, Applied Sciences  [78] | Machine-Learning-Based COVID-19 and Dyspnoea Prediction Systems for the Emergency Department | Italy | Mar-Jun 2020 | Retrospective (NS) | Single centre | COVID-19  (laboratory-confirmed positive and negative) | 443:  ◦ 271  (COVID-19 positive)  ◦172  (COVID-19 negative) | *Overall*  Age (years):  ◦Median (IQR): 60 (47.0-73.0)  *COVID-19 positive*  Age (years):  ◦Median (IQR): 63 (51.0 -75.0)  *COVID-19 negative*  Age (years):  ◦Median (IQR): 54 (37.0-67.5)  Sex/gender: NS  Race/ethnicity: NS |
| Eurich *et al*., 2025, Advances in artificial intelligence and machine learning  [79] | Predicting COVID-19 Outcomes Among Albertans With Diabetes and COVID-19: A Machine Learning Approach | Canada | Mar 2020 to Mar 2021 | Retrospective (NS) | Likely multicentre  (information from Alberta residents)  (number of centres not specified)  (Note: the study also included data from a community cohort, but only extracted data from the ED cohort were extracted) | COVID-19  (positive)  (Note: Albertans with diabetes who tested positive for COVID-19.) | 1,497 COVID-19 cases  (by 1495 individuals) | *Training set for ED cohort*  Age (years):  ◦Mean (SD): 61.56 (16.90)  Male: 44.77%; female: 54.90%  *Validation set for ED cohort*  Age (years):  ◦Mean (SD): 60.65 (17.65)  Male: 48.67%; females: 51.33%  Race/ethnicity: NS |
| Gabbay *et al*., 2021, Applied Sciences  [80] | A LIME-Based Explainable Machine Learning Model for Predicting the Severity Level of COVID-19 Diagnosed Patients | Mexico  (open dataset from the Mexican Federal Health Secretary) | May-Oct 2020 | Retrospective (NS) | Likely multicentre  (open dataset from the Mexican Federal Health Secretary through the General Director of Epidemiology)  (number of centres not specified) | COVID-19  (diagnosed) | >50,000 | Age: NS  Sex/gender: NS  Race/ethnicity: NS |

NS: not specified; SD: standard deviation; IQR: interquartile range; ED: emergency department

The study design type (retrospective vs prospective) was extracted as specified in the article. In case it was not specified, we deduced whether it was retrospective or prospective and added “NS”.

The terms “race”, “ethnicity” or “race/ethnicity” were reported as specified in the study.

**Table S4: Geographical distribution of studies from which the data were obtained, by country**

| **Origin of data** | **N (%)** |
| --- | --- |
| **North America** |  |
| United States | 20 (38) |
| Canada | 4 (8) |
| Mexico | 1 (2) |
|  |  |
| **South America** |  |
| Brazil | 2 (4) |
|  |  |
| **Northern Europe** |  |
| Sweden | 1 (2) |
| Latvia | 1 (2) |
| Ireland | 1 (2) |
|  |  |
| **Western Europe** |  |
| Netherlands | 1 (2) |
| United Kingdom | 2 (4) |
| Belgium | 1 (2) |
|  |  |
| **Central Europe** |  |
| Germany | 1 (2) |
| Austria | 1 (2) |
| Switzerland | 1 (2) |
|  |  |
| **Southern Europe** |  |
| Italy | 10 (19) |
| Spain | 7 (13) |
| Greece | 2 (4) |
|  |  |
| **Eastern Europe** |  |
| Bosnia and Herzegovinia | 1 (2) |
| Turkey | 1 (2) |
|  |  |
| **East Asia** |  |
| South Korea | 3 (6) |
| Taiwan | 4 (8) |
| Japan | 1 (2) |
|  |  |
| **South East Asia** |  |
| Singapore | 1 (2) |
| Thailand | 1 (2) |
|  |  |
| **North-eastern Africa** |  |
| Sudan | 1 (2) |
|  |  |
| **Southern Africa** |  |
| South Africa | 1 (2) |
|  |  |
| **Other** |  |
| Unclear (United States or South Korea) | 1 (2) |

This table includes all countries where a model was trained, tested and/or validated, including external validation.

1 study trained and tested a model using data from the United States, Japan, Taiwan, South Korea, Thailand, Brazil, Canada and United Kingdom; 1 study used a dataset from a European registry: mainly from Germany (98.1%), Austria, Belgium, Italy, Switzerland, Latvia, Spain, Bosnia, Herzegovina, and Turkey; 1 study trained and tested a model in Canada and did external validations in Italy and Brazil; 1 study trained and tested a model in South Africa and did external validations in the United Kingdom and Sudan.

**Fig S1: Type of outcomes predicted by machine learning-based models in included studies (n=52)**

Note:Some studies predicted more than one outcome, therefore the total percentage is >100%; Respiratory-related/ventilatory support includes oxygen supply, central apnea, non-invasive and invasive mechanical ventilation, and intubation; Composite outcomes refers to outcomes that combined two or more events (e.g. ICU admission or death) and such outcomes were counted only once; ARDS: Acute respiratory distress syndrome; ED: Emergency department; ICU: intensive care unit

**Fig S2: Type of features (variables) considered to build machine learning-based predictive models in included studies (n=52)**

*Out of the 44 studies including sociodemographic characteristics, 36 included information on sex or gender (25 studies included information on sex specifically, 1 on gender, and 10 used the terms sex and gender wrongly/interchangeably) and 10 included information on race and/or ethnicity

**Sociodemographic characteristics** (e.g., age, sex, gender, race/ethnicity, income, education, weight, body mass index);

**Symptoms/ complaints** (e.g., cough, breathing difficulties);

**Medical history** (e.g., comorbidities, medication, treatment, smoking, and alcohol intake);

**Physical findings** (e.g., wheeze);

**Vital signs (**e.g., respiratory rate, oxygen saturation, temperature, systolic blood pressure, diastolic blood pressure);

**Clinical scores** (e.g., Glasgow Coma Scale, Pneumonia Severity Index);

**Laboratory results** (e.g., full blood count, biochemistry, liver or kidney function, D-dimers, inflammatory markers, blood gas)

**Radiological data:** These consisted of either structured data (e.g., whether chest X-ray or CT scan was performed, presence of pleural effusion or pre-extracted radiological features) or unstructured data (chest X-ray or CT scan images)

**Unstructured data** (e.g. free text, medical notes, discharge notes)

**Table S5: Outcomes measured, management of missing data, and type and performance of machine learning models, their comparators and validation strategies (n=52)**

| **Author, year** | **Outcomes measured** | **Management of missing data and proportion of missing** | **Machine learning or deep learning methods/algorithms tested** | **ROC AUC of primary or best performing machine learning or deep learning method/algorithm tested* (for test set)** | **ROC AUC of comparators (if any)** | **ROC AUC of different validation strategies (temporal, external, real-time application, if any)** |
| --- | --- | --- | --- | --- | --- | --- |
| Tan *et al.* 2021  [29] | Hospitalization  ICU admission  Sepsis or septic shock  In-hospital mortality  (Note: pneumonia also measured but not part of outcomes of interest.) | Patients with no record of follow-up were excluded  Missing laboratory data were treated as normal values and were carefully processed  % missing: NS | Logistic regression  Random forest  XGBoost  LightGBM  SVM  KNN  MLP | *Random forest*  **AUC 0.840**  (hospitalization)  **AUC** **0.857**  (sepsis or septic shock)  *XGBoost*  **AUC** **0.902**  (ICU admission)  *Logistic regression*  **AUC** **0.889**  (in-hospital mortality) | NA | Real time deployment to assist physician decision  **No AUC reported** |
| Yu *et al.* 2021  [30] | Mechanical ventilation  (Note: mortality also measured but only among hospitalized patients.) | Missing categorical values (e.g., smoking) were recorded as “not asked”  Missing vital signs values were replaced by corresponding mean values  % missing: NS | XGBoost | **AUC not specified**  (**accuracy 0.82)**  **AUC 0.68**  (prospective (temporal) validation reported) | NA | Prospective (temporal) validation (Apr 18, 2020 to May 6, 2020)  **AUC 0.68**  **Accuracy 0.86** |
| Wong *et al.* 2020  [31] | Antibiotics clearly not recommended (1 = NABX) vs physician should review the need for antibiotics (0 = RABX) | Variables with >10% missing data were excluded from analysis  Missing categorical values were recorded as 0  Missing continuous values were imputed using group means  % missing: NS | Logistic regression  LASSO regression  CART | *Logistic regression*  **AUC** **0.72** | NA | NA |
| Walsh *et al.* 2004  [32] | Disposition  (admission vs discharge)  Length of stay | Missing data were coded as such  % missing: NS | Artificial neural network ensemble | **AUC not specified**  (disposition **accuracy 0.81**; length of stay **accuracy 0.65)**  (Note: ensemble performed better than individual neural networks.) | *Admitting resident physician*  **Accuracy 0.77**  (disposition) | NA |
| Walsh *et al.* 2015  [33] | Central apnea  (after initial ED visit) | NS | Poisson regression  CART  Random forest | *Random forest*  **AUC** **0.92** | NA | NA |
| Subudhi *et al.* 2021  [34] | ICU admission  (within 5 days of ED encounter)  Mortality  (within 28 days of ED encounter) | Patients with ≥1 missing dependent (outcome) variable were excluded  Missing independent (predictor) variables were imputed using KNN algorithm  % missing: 3.1% for outcome variables (calculated) | Eighteen ML algorithms belonging to nine broad categories:  1. Ensemble  (*AdaBoostClassifier*, *BaggingClassifier*, *GradientBoostingClassifier*, *RandomForestClassifier*, *XGBclassifier*, *ExtraTreeClassifier*)  2. Gaussian process  (*GaussianProcessClassifier*)  3. Linear models  (*LogisticRegression*, *PassiveAggressiveClassifier*, *SGDClassifier*, *Perceptron*)  4. Naïve Bayes  (*GaussianNB*)  5. Nearest neighbor  (*KNeighborsClassifier*)  6. SVM  (*LinearSVC*)  7. Tree-based models  (*DecisionTreeClassifier*)  8. Discriminant analysis  (*LinearDiscriminantAnalysis*, *QuadraticDiscriminantAnalysis*)  9. Neural network  (*MLPClassifier)* | Ensemble-based methods performed better than other model types for ICU admission and mortality prediction (all ensemble-based models had mean **F1 score ≥ 0.8** for ICU admissionand **F1 score > 0.83** for mortality).  (Note: calibration plots with different AUCs are provided in Supplementary Figure 2 of the Subudhi *et al*. article.)  (Note: in the Discussion, the authors mentioned that they performed SHAP analysis of the random forest model, as it was one of the best-performing models.) | NA | Temporal validation: performance of all ML models dropped, but ensemble methods remained best (ICU admission **F1 score ≥ 0.4** and mortality **F1 score ≥ 0.26)** |
| Shamout *et al.* 2021  [35] | Clinical deterioration: (composite of intubation, ICU admission, or in-hospital mortality within 24, 48, 72 and 96 h; only time of first event considered) | For missing vital signs or lab tests, the most recent measurement was carried forward; if none was available, values were left missing  For missing clinical variables, mean imputation of model predictions assigned to the validation set was performed | COVID-GBM  (gradient boosting on clinical variables)  COVID-GMIC  (deep CNN on CXR)  COVID-GMIC + COVID-GBM  (model ensembling - multimodal late-fusion)  (Note: there was also a model, COVID-GMIC-DRC, which predicts how patient’s risk of deterioration evolves over time in the form of deterioration risk curves.) | *Ensemble of COVID-GMIC and COVID-GBM (X-ray plus clinical- multimodal prediction)*  **AUC** **0.786**  (test set at 96h)  **AUC** **0.819**  (reader study dataset at 96h)  **AUC 0.808**  (COVID-GMIC with reader study dataset at 96h) | *Radiographic comparators (reader study dataset):*  *Radiologist A and B at 96h*  **AUC** **0.74**  *COVID-GMIC at 96h*  **AUC 0.808**  *Logistic regression model trained with clinical variables only*  **AUC 0.728** (at 96h) | Prospective silent validation (clinical setting; CXR only)  **AUC 0.717**  (average of predictions of an ensemble of the deployed models)  Retrospective test set  **AUC 0.748**  (pre-deployement) |
| Ortiz-Barrios *et al.* 2023  [36] | ICU admission | Missing information for each feature was imputed using median values | Random forest | **AUC 0.9548** | NA | NA |
| Nicora *et al.* 2024  [37] | Hospitalization | NS | Random forest  Bayesian network  (Note: regularized logistic regression and gradient boosting models were also trained, but only the random forest results are reported, as it achieved the best performance.)  (Note: A deep learning algorithm was used to extract features from CXR and the CXR image of each patient was converted into numerical clinically relevant features) | *Bayesian network*  **AUC 0.80**  (test set, first wave): | NA | Temporal validation (third wave)  **AUC 0.83**  (random forest)  **AUC 0.80**  (bayesian network) |
| Mushtaq *et al.* 2021  [38] | Death (primary)  Critical COVID-19  (ICU admission or death occurring before ICU admission) | Imputation for missing data was not performed  % missing: comorbidities 2.1%, temperature: 7.6%, PaO2/FiO2: 12.9%, symptom onset: 5.5%, AI score: 1.6% | CNN-based DL AI system using a set of CNNs trained to detect specific abnormalities on frontal CXR  (Note: Multivariate Cox regression model to identify predictors of outcome.) | *Qure AI score*  **AUC 0.66**  (mortality)  **AUC 0.77**  (critical care) | *Radiographic assessment of lung edema (RALE) score calculated by 2 radiologists*  **AUC 0.67**  (mortality)  **AUC 0.75**  (critical care) | NA (previously trained algorithm for CXR) |
| Morís *et al.* 2024  [39] | Hospitalization  (Note: death also measured but only among hospitalized patients.) | Discrete variables were 0-padded and numerical variables were padded with -1  % missing: NS | Deep feature extraction from CXR using a CNN  XGBoost classifier  ◦Approach I: clinical data only  ◦Approach II: imaging data only  ◦Approach III: clinical plus imaging data (multimodal data fusion) | *Approach III (multimodal data fusion)*  **AUC: 0.845** | NA | NA |
| Montoro *et al.* 2023  [40] | Hospital admission  ICU admission  Death  (Note: outcomes collected after 5 months.) | Patients lost to follow-up were counted as missing  % missing: 3%  (9 patients) | AI-Rad Companion  (online AI platform that uses an advanced deep reinforcement learning algorithm for anatomical landmark detection)  CNN (DenseUNet) was used for opaque region detection/quantification | **AUC 0.807**  (low opacity percentage (LOP) in any lung)  **AUC 0.861**  (high opacity percentage (HOP) in any lung)  (Note: chi-square tests were conducted to assess the statistical association between the opacity tests (LOP and HOP) and hospital admission, ICU admission, and death. A significant association was found between the results of both LOP and HOP tests and hospital admission in both the COVID-19–negative and COVID-19–positive group; the HOP test also showed an association with ICU admission in both groups and with death specifically in the COVID-19–positive group.) | NA | NA (pretrained) |
| Logaras *et al.* 2022  [41] | Inpatient unit admission | Missing values were imputed using KNN  % missing: NS | Logistic regression  Random forest  SVM  Other ML methods  (not fully specified)  (Note: a neural network was also used for respiratory evaluation of hospitalized patients.) | *Random forest (selected predictors)*  **AUC 0.80** | NA | NA |
| Lin *et al.* 2024  [42] | Admission  30-day mortality  (for all ED patients)  In-hospital mortality  (for admitted patients) | NS | Blood culture prediction index (BCPI) model  (type not specified; prior work used random forest)  Novel ML model incorporating CURB-65 into BCPI using Cox regression | (Note: only AUC for in-hospital mortality is reported.)  **AUC 0.674**  (BCPI)  **AUC 0.713**  (BCPI + CURB-65) | (Note: it is stated that the predictive performance of the BCPI model and CURB-65 score for the 30-day mortality rate in ED patients was comparable; however, only the AUC for in-hospital mortality is reported.)  *CURB-65*  **AUC 0.668** | NA |
| Kwon *et al.* 2021  [43] | Admission  Intubation  Death  (within 30 days) | Mean imputation was used for unavailable laboratory values  Weight or height was missing for 29 patients (18%) in test set (calculated) | CNN (DenseNet121)  ◦Model trained on CXR  ◦Model trained on clinical variables  ◦Combined model  (CXR plus clinical variables) | *Combined CXR and imaging (holdout test set)*  **AUC 0.88**  (intubation)  **AUC 0.82**  (death)  *Chest radiography*  **AUC 0.76**  (admission) | NA | Holdout test set from a different period than training |
| Kim *et al.* 2023  [44] | 30-day mortality  (all causes) | Forty patients (~0.6%) with missing mortality information were excluded (developmental cohort) | Deep learning CNN (DenseNet121) based on CXR findings  CURB-65 + CNN combined in a logistic regression model | *Combined DL plus CURB 65*  **AUC 0.84**  (internal test set)  *DL only*  **AUC 0.83**  (internal test set) | *CURB-65*  **AUC 0.68**  (internal test set)  **AUC 0.67**  (temporal test set)  **AUC 0.73**  (external cohort A)  **AUC 0.72**  (external cohort B) | Temporal validation  **AUC 0.77**  (Combined DL + CURB 65)  **AUC 0.77**  (DL only)  External validation  **AUC 0.80**  (combined DL + CURB 65, external cohort A)  **AUC 0.80**  (DL only, external cohort A)  **AUC 0.80**  (combined DL + CURB 65, external cohort B)  **AUC 0.80**  (DL only, external cohort B) |
| Kang *et al.* 2020  [45] | ICU admission  (from the ED) or 30-day mortality (any cause within 30 days of the ED visit) | Multiple imputation was used to address missing data  % missing: NS | CURB-RF  (model consisted of the same variables as CURB-65 but with continuous and non-dichotomous values and using the random forest method)  E-CURB-RF  (Extensive-CURB-RF: model contained more variables than CURB-65, and also continuous values, and random forest method was applied.) | *E-CURB RF*  **AUC 0.844** | *CURB-65*  **AUC 0.615** | NA |
| Jones *et al.* 2023  [46] | Hospitalization  (any admission to acute medical, surgical, or ICU, with either inpatient or observation status, within 24h of ED encounter  30-day mortality  (any cause) | Missing value were encoded as 0, and an indicator of missingness was created for each variable  % missing: 0–97.4%  (per-variable proportions reported in Jones *et al*., table 1) | XGBoost | **AUC 0.89**  (hospitalization)  **AUC 0.87**  (mortality) | NA | NA |
| Jones *et al.* 2021  [47] | 30-day mortality  (all causes)  Hospitalization  (any admission to an acute medical, surgical, or ICU, with either inpatient or observation status, within 24h of the ED encounter  7-day secondary hospitalization  (hospitalization within 7 days of the initial encounter after the patient was treated in the ED and released without hospitalization) | Vital signs missing in <5% of cases were assumed as missing at random, and imputed with a single median values  Laboratory values not obtained were replaced with a normal value  No other missing values | Ten novel models using logistic regression and ML algorithms differing by number and treatment of variables:  1. logPSI: logistic regression pneumonia severity index (PSI) model refit with PSI factors and original binary cutoffs  2. logPSI with PSI factors as continuous variables and assumed linear relationships  3. logPSI with age, sex, and 26 physiologic factors  4. logPSI with 15 additional laboratory values, 41 additional demographic variables, and 13 comorbidity variables (69 variables total)  5. splinePSI: spline logPSI model with PSI factors and continuous variables allowing nonlinear relationships  6. splinePSI with age, sex, and 26 physiologic factors  7. splinePSI with 69 total patient factors  8. mlPSI: boosted decision-tree PSI model using XGBoost with the 19 original PSI factors  9. mlPSI-28: mlPSI with age, sex, and 26 physiologic factors  10. mlPSI-69: mlPSI with all 69 variables | *ml-PSI -boosted decision tree algorithm machine learning PSI model using Extreme Gradient Boosting algorithm with 69 variables*  (Note*:* the mlPSI-28 had similar performance)  **AUC 0.89**  (mortality, derivation cohort, ml-PSI-69)  **AUC 0.89**  (mortality, derivation cohort, mlPSI-28)  *Secondary analyses*  **AUC range 0.86–0.88**  (hospitalization, novel models)  **AUC range 0.68–0.67**  (7-day secondary hospitalization among outpatients, novel models)  (Note: performance was shown graphically in Supplement D–Figure E1 and E2 of the article by Jones *et al.*, 2021.) | *Computerised pneumonia severity index*  **AUC 0.77**  (mortality) | (Note: the training/derivation dataset was drawn from early years and the validation dataset from more recent years; model performance was similar in the derivation and validation (temporal) datasets.)  Validation (temporal) for mortality  **AUC 0.88**  (ml-PSI 69)  **AUC 0.87**  (ml-PSI 28) |
| Ji *et al.* 2023  [48] | Revisit within 7 days  (any ED encounter within 7 days after the date of a previous ED encounter with a diagnosis of COVID-19) | Absence of a clinical concept labelled as missing | Transfer learning using Domain Adversarial Neural Network (DANN): single-DANN and multi-DANN algorithms  Three baseline models using the same two fully connected layers for feature architecture were designed | *Multi-DANN models*  **AUC median 0.8, maximum 0.93**  (Note: multi-DANN models consistently exhibited significantly higher AUC values across all ERs.) | NA | Encounters for training occurred earlier than encounters for testing (temporal validation) |
| Jhaveri *et al.* 2025  [49] | Disposition  (admission) | NS | Deep neural network based on a standard 2D CNN deployed in a clinical setting.  (external validation) | (Note: the model was already developed and this study externally validated the model.)  **AUC 0.67** | NA | (Note: the study is already an external validation.)  **AUC 0.67**  Prospective external validation with shadow deployment  **AUC 0.67** |
| Husain *et al.* 2022  [50] | Hospitalization/inpatient care  (hospitalized for >72h and/or required significant clinical intervention, such as intravenous therapies and/or supplemental oxygen or mechanical ventilation) | Patients were followed for 28 days after their ED visit via medical records and/or phone call; patients who withdrew from the study were excluded from analysis  % missing: NS | XGBoost | **AUC 0.76**  (Canada test dataset)  (Subgroup: COVID-19 and pneumonia) | *CRB-65*  **AUC 0.61**  (Canada test dataset)  **AUC 0.77**  (Italy test dataset)  **AUC 0.66**  (Brazil test dataset) | External validation  **AUC 0.84**  (Italy)  **AUC 0.86**  (Brazil) |
| Hinson *et al.* 2024  [51] | Critical care needs within 24h of ED disposition  (patient died, was admitted to an intermediate or ICU, or developed cardiovascular or respiratory failure within 24h of ED disposition)  Inpatient care needs within 72h of ED disposition  (patients with at least moderate cardiovascular or respiratory dysfunction, or discharged at initial ED visit and with return ED visit plus hospitalization within 72h) | Encounters with missing data were not excluded and missing data were not imputed; instead, missingness was included as a category for each variable  % missing: NS | Random forest  Three models were evaluated:  **◦**Model 1: predictors available at ED triage (demographics, triage vitals, chief complaints, active medical problems)  **◦**Model 2: model 1 plus ED lab results  **◦**Model 3: model 2 plus ED oxygen requirements, last vital signs before disposition, and vital sign trends | *Model 3*  **AUC 0.90**  (critical care, derivation cohort spatial)  **AUC 0.89** (critical care, derivation cohort, temporal)  **AUC 0.90**  (inpatient care, derivation cohort, spatial)  **AUC 0.89**  (inpatient care, derivation cohort, temporal) | NA | Temporal and spatial validation – Model 3  **AUC: 0.90**  (critical care, spatial validation cohort)  **AUC 0.89**  (critical care, temporal validation cohort)  **AUC 0.86**  (Inpatient care, spatial validation cohort)  **AUC 0.90**  (inpatient care, temporal validation cohort) |
| Hinson *et al.* 2022  [52] | Critical care needs within 24h of ED disposition  (patient died, was admitted to an intermediate or ICU, or developed cardiovascular or respiratory failure within 24h of ED disposition)  Inpatient care needs within 72h of ED disposition  (patients with at least moderate cardiovascular or respiratory dysfunction, or discharged at initial ED visit and with return ED visit plus hospitalization within 72h) | Continuous variables were transformed into discrete categories to encode predictor missingness  % missing: NS | Random forest | **AUC 0.91**  (critical care, retrospective validation)  **AUC 0.90**  (inpatient care, retrospective validation) | NA | Prospective validation (silent deployment in clinical setting)  **AUC 0.85**  (critical care)  **AUC 0.80**  (inpatient care)  Prospective validation (visible deployment in clinical setting)  **AUC 0.85**  (critical care)  **AUC 0.82**  (inpatient care) |
| Henriksson *et al.* 2023  [53] | 30-day all-cause mortality  (death within 30 days following the ED encounter)  Safe discharge  (patients not hospitalized and not deceased within 14 days of the ED encounter)  Readmission  (patients discharged from the ED but later hospitalized or deceased within the following 14 days) | For some categorical variables (e.g., region of birth, education level, income), majority imputation was applied.  For other structured data features, multivariate imputation was used  % missing: NS | Multimodal fine-tuning using structured and unstructured data: dimensions from a Clinical KB-BERT clinical language model concatenated with structured features and input to a fully-connected neural network  Two unimodal models:  1. Fully connected neural network based on structured data only  2. Clinical KB-BERT fine-tuned on unstructured data only  Multimodal ensemble of the two unimodal models combined in a late fusion fashion | *Multimodal fine-tuning*  **AUC 0.91**  (mortality)  **AUC 0.97**  (discharge)  **AUC 0.81**  (readmission) | NA | NA |
| Garrido *et al.* 2025  [54] | Mortality | NS | Random forest  Gaussian naive Bayes  KNN  Bayesian linear discriminant analysis  SVM  Decision trees | *Random forest*  **AUC 0.93** | NA | External validation  **AUC 0.91** |
| Garrido *et al.* 2024  [55] | Mortality | Missing values were managed using appropriate imputation techniques (mean, median, or mode, depending on data type)  % missing: NS | XGBoost  Decision trees  Gaussian naive Bayes  KNN  SVM  Neural networks  Random forest  CNN  AdaBoost  Bayesian linear discriminant analysis | *XGBoost*  **AUC 0.92** | NA | NA |
| Fuller *et al.* 2023  [56] | Composite adverse outcome  (intubation or non-invasive ventilation in the ED on index attendance, ICU admission, or inpatient death up to 30 days from index attendance) | Complete-case analysis: all cases with any missing values were excluded  When comorbidities were not recorded, they were assumed absent  Implausible physiological values were set to missing  The influence of missing data was explored using deterministic imputation, multiple imputation, and the built-in XGBoost missing data algorithm  % **complete** data: Western Cape 92.3% (training dataset), Western Cape 92.8%, UK 91.6%, Sudan 49.9% (temporal validation) | XGBoost | **C-statistic (AUC) 0.91** | NA | Temporal validation  **AUC 0.84**  (Western Cape)  Geographical (external) validation  **AUC 0.72**  (UK cohort)  **AUC 0.62**  (Sudanese cohort) |
| Fong *et al.* 2025  [57] | ED return | Encounters with incomplete data were excluded  % missing: NS | XGBoost | **AUC 0.659**  (health system 1)  **AUC 0.684**  (health system 2) | NA | NA |
| Dipaola *et al.* 2023  [58] | 30-day mortality  ICU admission | Missing tabular training data values were randomly generated using a normal distribution based on the training values when percentage of missing values did not exceed 5%  % missing: at least 5% of the studied population for some variables (respiratory rate, oxygen saturation, temperature) | Artificial neural network combining textual and tabular data (fastai, TensorFlow): TensorFlow tabular model, fastai tabular model, TensorFlow tabular-textual model, fastai tabular-textual model  XGBoost | *TensorFlow tabular-textual and Tensorflow tabular*  TensorFlow tabular-textual: **AUC 0.87**  (mortality)  TensorFlow tabular: **AUC 0.88**  (mortality)  TensorFlow tabular textual: **AUC 0.80**  (ICU admission)  TensorFlow tabular: **AUC 0.83**  (ICU admission) | NA | NA |
| Di Napoli *et al.* 2023  [59] | Death  Intubation  ICU admission | Part of the missing data was obtained by directly contacting patients or relatives | DL: artificial neural network on chest CT using  a 3D residual neural network (3D-ResNet) CNN framework  Different models evaluated:  1. CT images only (CT)  2. CT images plus clinical features (CT + CF)  3. CT images, clinical features, and laboratory data (CT+ CF + LD)  4. Clinical plus laboratory features (CF+ LD) | CT + CF + LD  **AUC 0.96**  (mortality)  CT + CF  **AUC 0.95**  (mortality)  CT+ CF + LD  **AUC 0.95**  (intubation)  CT + CF  **AUC 0.95**  (intubation)  CT+ CF+LD  **AUC 0.94**  (ICU admission)  CT + CF  **AUC 0.94**  (ICU admission) | NA | External validation  CT + CF + LD  **AUC 0.74**  (mortality)  CT + CF  **AUC 0.72**  (mortality)  CT + CF + LD  **AUC 0.66**  (intubation)  CT + CF  **AUC 0.64**  (intubation)  CT + CF + LD  **AUC 0.69**  (ICU admission)  CT + CF  **AUC 0.70**  (ICU admission) |
| Dayan *et al.* 2021  [60] | Oxygen requirement at 24h  (after initial presentation to the ED)  Oxygen requirement at 72h (after initial presentation to the ED)  (Note: model output is a risk score, named EXAM (EMR CXR AI model), a continuous value in the range of 0–1 for the 24- and 72-hour predictions.) | MissForest was used to impute missing EMR features  If a feature was completely absent at a site, the mean value from the MGB site was used  % missing: NS | Model fusing EMR and CXR features using a 34-layer CNN (ResNet34) to extract CXR features and a Deep & Cross network to concatenate them with EMR features; federated learning used to train the EXAM model across 20 institutes  (Note: locally trained models were compared with the global federated learning model.) | *Global federated learning model*  **Average AUC>0.92**  (oxygen requirement at 24 and 72h)  (Note: local test sets: **average AUC 0.795**) | NA | External validation at 3 institutions (oxygen requirement)  **AUC 0.944**  (site 1(CDH), 24h)  **AUC 0.924**  (site 1(CDH), 72h)  **AUC 0.901**  (site 2 (MVH), 24h)  **AUC 0.916**  (site 2 (MVH), 72h)  **NA**  (site 3 (NCH), 24h)  **AUC 0.927**  (site 3 (NCH), 72h) |
| Davazdahemami *et al.* 2022  [61] | Readmission to the ED within 7 days after discharge | NS | Fully connected MLP deep artificial neural network using genetic algorithm for feature selection | **AUC 0.883** | NA | NA |
| Chung *et al.* 2022  [62] | Oxygen requirement at 24h (from the time of admission to the ED):  **◦**RA: room air  **◦**LFO: low-flow oxygen  **◦**HFO: high-flow oxygen  **◦**MV: mechanical ventilation  Oxygen requirement at 72h (from the time of admission to the ED):  **◦**RA: room air  **◦**LFO: low-flow oxygen  **◦**HFO: high-flow oxygen  **◦**MV: mechanical ventilation | NS | Pre-trained CXR explainable AI model (DenseNet-121 CNN) to detect radiological features combined with clinical features and trained with random forest  Two models:  1. CXR without clinical information  2. CXR with clinical information | **AUC not found**  (ROC curve presented in supplementary Figure 2 of the article by Chung *et al.* but AUC for outcomes of interest not found)  Depending on outcome, either the model with CXR plus clinical information or the model using only CXR performed best  Model with CXR plus clinical information vs CXR only  (**accuracy at 24h):**  **◦**RA: **0.852** vs **0.756**  **◦**LFO: **0.784** vs **0.677**  **◦**HFO: **0.956** vs **0.951**  **◦**MV: **0.901** vs **0.888**  **(accuracy at 72h):**  **◦**RA: **0.827** vs **0.767**  **◦**LFO: **0.721** vs **0.641**  **◦**HFO: **0.893** vs **0.912**  **◦**MV: **0.797** vs **0.773** | NA | NA |
| Chen *et al.* 2021  [63] | Sepsis or septic shock  Respiratory failure  Mortality | If a vital sign or laboratory value was missing, a normal value was given  SpO2 was used as a replacement when PaO2 was missing  39,560 patients (43%) with insufficient data were excluded | Logistic regression  Random forest  SVM  LightGBM  MLP  XGBoost  AIoT-based model | *Random forest*  **AUC 0.781**  (sepsis and septic shock)  *LightGBM*  **AUC 0.847**  (respiratory failure)  **AUC 0.835**  (mortality)  (Note: LightGBM was selected as the prediction model following a multidisciplinary team discussion.) | *CURB-65*  **AUC** **0.681**  (mortality)  *Pneumonia severity index (PSI)*  **AUC 0.728**  (mortality) | Real-time AIoT model integrated with health information system (HIS) and an Internet of Things (IoT) infrastructure for decision support; the AIoT model outperformed CURB-65 and PSI  **AUC 0.835** vs. **0.681** vs **0.728** |
| Chamberlin *et al.* 2022  [64] | Hospitalization  ICU admission  Intubation  Mortality | NS | Deep CNN on chest CT (previously trained) plus multivariate logistic regression for outcome prediction | **AUC 0.810**  (hospitalization)  **AUC 0.666**  (ICU admission)  **AUC 0.683**  (intubation)  **AUC 0.681**  (mortality) | NA | This cohort already constitutes an external validation cohort |
| Chamberlin *et al.* 2022  [65] | Hospitalization  ICU admission  Intubation  Mortality  (all-cause) | Missing data from 32 patients (1.3%) due to failed AI segmentation because of poor imaging quality were excluded | Deep CNN on CXR plus multivariate logistic regression for prediction of outcomes  Two models:  1. Prediction with AI score alone  2. Prediction with AI score, age and body mass index (BMI) | *AI score, age, and BMI*  **AUC 0.758**  (hospitalization)  **AUC 0.880**  (ICU admission)  **AUC 0.806**  (intubation)  **AUC 0.906**  (mortality) | NA | NA |
| Cato *et al.* 2024  [66] | Safe discharge (no return to the ED within 72h) vs return to hospital within 72h of ED discharge or transfer to the inpatient setting with a stay of ≥24h | For categorical features with missing data, records were maintained  One patient was excluded due to five missing continuous values | XGBoost  Random forest classifier  Logistic regression | *XGBoost*  **AUC 0.90** | NA | NA |
| Catalano *et al.* 2023  [67] | Hospitalization vs home care  Three categories:  ◦Mild: not hospitalized or hospitalized without ventilatory support  ◦Moderate: hospitalized with continuous positive airway pressure device support (CPAP)  ◦Severe: hospitalized with invasive ventilatory support or deceased | Features with >90% missingness were removed  Remaining missing data were imputed with the most frequent value for categorical variables and the mean for numerical variables  % missing: NS | ALFABETO (ALL-Faster-Better-Together) tool combining clinical, laboratory, and imaging data  Clinical features combined with CXR features (extracted via deep learning X-RAIS model based on DenseNet121- a deep CNN network) and trained using random forest  (Note: logistic regression, MLP, gradient boosting, Bayesian network, and random forest were trained; random forest achieved the best precision and recall and was therefore the focus of the analysis.) | **AUC 0.83** | NA | ALFABETO previously trained in first wave; this study reassessed in the third wave |
| Casiraghi *et al.* 2020  [68] | Low-risk vs high-risk:  ◦Low-risk: not hospitalized or, if hospitalized, never intubated and survived without serious consequences  ◦high-risk: intubated, had serious consequences, or died | Multiple imputation methods were evaluated under different missing-data mechanisms: missing completely at random, missing at random, and missing not at random  Imputation methods used were multiple imputation by (i) chained equations (MICE): micePMM (predictive mean matching) and miceRF (MICE using random forests) and (ii) missForest  Two laboratory variables with >50% missingness were removed | Random forest  Associative trees  Generalized linear models  Multiple imputation methods:  1. missForest  2. miceRF | *Random forest plus missForest*  **AUC 0.81** | NA | NA |
| Calvillo-Batllés *et al.* 2022  [69] | Three severity levels:  ◦Level 0: home discharge or hospitalization ≤ 3 days  ◦Level 1: hospital stay >3 days  ◦Level 2: need for ICU stay or death due to COVID-19  Mortality | Loss of ≥ 1 laboratory parameter in 67 patients (15%) because test had not been performed | Lung findings were extracted from CXR by a CNN  Predictive models developed using: gradient boosting, random forest, SVM  Models with three different combinations:  1. Epidemiological and radiological parameters  2. Epidemiological, radiological, clinical, and laboratory parameters  3. Epidemiological, radiological, clinical, laboratory, and CNN-based parameters | *Epidemiological, radiological, clinical and lab*  **AUC 0.938**  (severity level)  *Gradient boosting with epidemiological, radiological, clinical, laboratory plus CNN features*  **AUC 0.971**  (mortality) | NA | NA |
| Butler *et al.* 2022  [70] | Acute respiratory distress syndrome (ARDS)  ICU admission  Mortality | Minimal missingness overall; 30 patients (0.8%) with no recorded ethnicity and 2 (0.06%) with no first oxygen level had these variables imputed using most frequent category or median | Transfer learning from pretrained CheXNet CNN model; radiograph-based predicted risk integrated into clinical models using LightGBM  LightGBM  Several models built:  1. Clinical variables only (42 or top 15 variables)  2. CXR only  3. CXR plus clinical variables | *CXR plus clinical data*  **AUC 0.781**  (ARDS)  **AUC 0.675**  (ICU admission)  **AUC 0.759**  (mortality) | NA | NA |
| Beiser *et al.* 2021  [71] | ED visits resulting in hospital admission (return hospital admission) within 30 days of the index visit | Covariates with > 15% missingness were excluded  Missing values were imputed  Laboratory values were excluded because of high missingness among discharged patients | GBM  Random forest  LASSO regression  CART (reference model) | *Random forest, GBM, and LASSO (similar performance)*  **AUC 0.75**  *CART*  **AUC 0.59** | NA | NA |
| Bartolucci *et al.* 2021  [72] | ICU admission | Patients with low-quality CT images or incomplete blood laboratory or arterial blood gas data were excluded (n=93, 45%) | Binomial regression using GLMNET  Five models using age, blood laboratory features, P/F ratio (ratio of arterial oxygen partial pressure to the fraction of inspired oxygen), radiological and radiomics features:  1. Blood laboratory and arterial gas analyses  2. Radiological  3. Radiomics  4. Hybrid radiological  5. Hybrid radiomics | *Hybrid radiological model (combining CT estimation of volume of consolidated lung with blood laboratory values and arterial blood gas analysis features)*  **AUC 0.82** | NA | Validation (test) set from later period than training (temporal validation) |
| Bartenschlager *et al.* 2023  [73] | Discharge/outpatient  Ward admission  ICU admission  (Note: palliative care unit was also an outcome.) | Data with >40% missingness were removed (after expert review)  Simple imputer and two iterative ML imputers (random forest and MLP) were used to filled missing values | MLP  XGBoost  Random forest  Integrated triage algorithm (integration of AI and human)  (Note: different imputers and comorbidities summaries (sum of comorbidities and Charlson Comorbidity Index) were used.) | *XGBoost (preferred algorithm)*  **AUC 0.84**  (discharge/outpatient)  **AUC 0.87**  (ward admission)  **AUC 0.81**  (ICU admission)  **AUC 0.84**  (Palliative care unit)  *ML techniques overall*  **Accuracy 0.78** | *Base triage algorithm*  **No AUC reported**  **Overall** **accuracy 0.27**  *Base triage algorithm extension*  **No AUC reported**  **Overall** **accuracy 0.51**  *Dummy classifier*  **AUC 0.5**  **Overall accuracy 0.04**  *Integrated triage algorithm*  **No AUC reported**  **Overall accuracy 0.73** | NA |
| Asteris *et al.* 2024  [74] | ICU admission | Hematologic indices with abnormal values (i.e. values with a substantial deviation from the mean) were excluded | Artificial neural networks used to propose a new Data Ensemble Refinement Greedy Algorithm (DERGA) to identify optimal combination of hematological indices using several classification algorithms and 15 indices  Classification algorithms included: decision trees, extra trees, random forest, gradient boost, and Gaussian process classification | *DERGA algorithm plus Extra Trees (consisting of 4 hematological indices)*  **AUC not reported**  **F1 score 0.91** | NA | NA |
| Ahmed *et al.* 2024  [75] | ICU admission | Any feature with >30% missingness was excluded  If a feature was categorical, a new “missing” category was added  If a feature is numerical, KNN imputation was applied  % missing: 0–9.6% | XGBoost  Nine models built with different selection features:  1. SFM_Lasso  2. SFM_DT  3. SFM_RF  4. SKB_Chi  5. RFE_PDT  6. RFE_RF  7. RFE_Lasso  8. X_expert  9. X_all  (Note: SFM: Select From Model; RFE: Recursive Feature Elimination) | *XGBoost (generated by SFM and Lasso)*  **AUC 0.892** | NA | NA |
| Etu *et al.* 2022  [76] | ED length of stay  (LOS <4h vs ≥4h) | Patient features unavailable at ED arrival (e.g., laboratory tests, other testing results) were excluded  Remaining missing data points for clinical variables were imputed with the mean  % missing: NS | Logistic regression  Gradient boosting  Decision tree  Random forest | *Gradient boosting*  **AUC 0.93**  (test set from later time point) | NA | Testing dataset served as a temporal validation (later time point than training dataset)  **AUC 0.93** |
| van Delft *et al.* 2022  [77] | Hospitalization  (Note: information extracted only for COVID-19.) | Choices for handling missing values were made by the predictors  Different models handled missing values differently: - H2O random forest: separate category for missing values; scikit-learn random forest: missing values replaced with averages | Random forest | **AUC 0.915** | NA | NA |
| La Salvia *et al.* 2022  [78] | Need for ventilation support | Patients with missing values were excluded (n=912, 67%) | SVM  Random forest | *Random forest*  **AUC 0.96** | NA | NA |
| Eurich *et al.* 2025  [79] | Hospitalization  Death  (Note: data extracted only for ED cohort.) | Missing income values were imputed using the average income  % missing: NS | Fifteen machine learning algorithms evaluated, including: logistic regression, random forest, extra trees, decision trees, CatBoost, XGBoost, AdaBoost, LightGBM, gradient boosting, etc. | *LightGBM was chosen for predicting death in ED cohort*  **AUC 0.82**  (death in ED cohort)  (Note: results for hospitalization were not reported due to poor performance.) | NA | NA |
| Gabbay *et al.* 2021  [80] | Severity level: high, medium, low  Model A:  ◦High: ICU admission, intubation or death  ◦Medium: NA  ◦Low: hospitalized (mild symptoms) or discharged  Model B:  ◦High: intubation or death  ◦Medium: hospitalized or ICU admission  ◦Low: discharged | Records with missing fields were removed | MLP artificial neural network: model A and model B  Random forest: model A and model B | *MLP model A and random forest model A*  **AUC not specified**  **Accuracy 0.80** | *Binary regression model*  **Accuracy 0.76** | ML model integrated into a mobile application |

AI: artificial intelligence; ROC AUC: area under the receiver operating characteristic curve (**note**: for simplicity, inside the tables it is written as AUC); CART: Classification and Regression trees; CNN: convolutional neural network; CXR: Chest X-ray; DL: deep learning; ED: emergency department; EMR: Electronic medical records: GBM: Gradient boosting machine; ICU: Intensive care unit; LightGBM: light gradient boosting machine; KNN: K-nearest neighbor; LASSO: least absolute shrinkage and selection operator; ML: machine learning; MLP: multilayer perceptron; MV: mechanical ventilation; NA: Not applicable; NS: Not specified; SVM: Support Vector Machine; XGBoost: Extreme Gradient Boosting

*If only one ML method is tested or mentioned in the article, the ROC AUC shown is that of the mentioned ML method, while if several ML methods are tested, the ROC AUC is that of the best performing ML method

**References**

[29] Tan TH, Hsu CC, Chen CJ, Hsu SL, Liu TL, Lin HJ, et al. Predicting outcomes in older ED patients with influenza in real time using a big data-driven and machine learning approach to the hospital information system. BMC Geriatrics 2021;21:280. https://doi.org/10.1186/s12877-021-02229-3.

[30] Yu L, Halalau A, Dalal B, Abbas AE, Ivascu F, Amin M, et al. Machine learning methods to predict mechanical ventilation and mortality in patients with COVID-19. PLoS One 2021;16. https://doi.org/10.1371/journal.pone.0249285.

[31] Wong JG, Aung AH, Lian W, Lye DC, Ooi CK, Chow A. Risk prediction models to guide antibiotic prescribing: a study on adult patients with uncomplicated upper respiratory tract infections in an emergency department. Antimicrobial Resistance and Infection Control 2020;9. https://doi.org/10.1186/s13756-020-00825-3.

[32] Walsh P, Cunningham P, Rothenberg SJ, O’Doherty S, Hoey H, Healy R. An artificial neural network ensemble to predict disposition and length of stay in children presenting with bronchiolitis. European Journal of Emergency Medicine : Official Journal of the European Society for Emergency Medicine 2004;11:259–64. https://doi.org/10.1097/00063110-200410000-00004.

[33] Walsh P, Cunningham P, Merchant S, Walker N, Heffner J, Shanholtzer L, et al. Derivation of candidate clinical decision rules to identify infants at risk for central apnea. Pediatrics 2015;136:e1298–306. https://doi.org/10.1542/peds.2015-1825.

[34] Subudhi S, Verma A, Patel AB, Hardin CC, Khandekar MJ, Lee H, et al. Comparing machine learning algorithms for predicting ICU admission and mortality in COVID-19. Npj Digital Medicine 2021;4. https://doi.org/10.1038/s41746-021-00456-x.

[35] Shamout FE, Shen Y, Wu N, Kaku A, Park J, Makino T, et al. An artificial intelligence system for predicting the deterioration of COVID-19 patients in the emergency department. Npj Digital Medicine 2021;4:1–11. https://doi.org/10.1038/s41746-021-00453-0.

[36] Ortiz-Barrios M, Arias-Fonseca S, Ishizaka A, Barbati M, Avendaño-Collante B, Navarro-Jiménez E. Artificial intelligence and discrete-event simulation for capacity management of intensive care units during the Covid-19 pandemic: A case study. J Bus Res 2023;160:113806. https://doi.org/10.1016/j.jbusres.2023.113806.

[37] Nicora G, Catalano M, Bortolotto C, Achilli MF, Messana G, Lo Tito A, et al. Bayesian Networks in the Management of Hospital Admissions: A Comparison between Explainable AI and Black Box AI during the Pandemic. J Imaging 2024;10. https://doi.org/10.3390/jimaging10050117.

[38] Mushtaq J, Pennella R, Lavalle S, Colarieti A, Steidler S, Martinenghi CMA, et al. Initial chest radiographs and artificial intelligence (AI) predict clinical outcomes in COVID-19 patients: analysis of 697 Italian patients. European Radiology 2021;31:1770–9. https://doi.org/10.1007/s00330-020-07269-8.

[39] Morís DI, de Moura J, Marcos PJ, Míguez Rey E, Novo J, Ortega M. Efficient clinical decision-making process via AI-based multimodal data fusion: A COVID-19 case study. Heliyon 2024;10:e38642. https://doi.org/10.1016/j.heliyon.2024.e38642.

[40] Montoro FS, Gordo MLP, Tascón ÁD, de Gracia MM, Velez SO, Fernández SF, et al. Quantification of pulmonary opacities using artificial intelligence in chest CT scans during SARS-CoV-2 pandemic: validation and prognostic assessment. Egyptian Journal of Radiology and Nuclear Medicine 2023;54. https://doi.org/10.1186/s43055-023-01105-x.

[41] Logaras E, Billis A, Kyparissidis Kokkinidis I, Ketseridou SN, Fourlis A, Tzotzis A, et al. Risk Assessment of COVID-19 Cases in Emergency Departments and Clinics With the Use of Real-World Data and Artificial Intelligence: Observational Study. JMIR Form Res 2022;6:e36933. https://doi.org/10.2196/36933.

[42] Lin YT, Lin KM, Wu KH, Lien F. Enhancing pneumonia prognosis in the emergency department: a novel machine learning approach using complete blood count and differential leukocyte count combined with CURB-65 score. BMC Medical Informatics and Decision Making 2024;24:118. https://doi.org/10.1186/s12911-024-02523-1.

[43] Kwon YJF, Toussie D, Finkelstein M, Cedillo MA, Maron SZ, Manna S, et al. Combining Initial Radiographs and Clinical Variables Improves Deep Learning Prognostication in Patients with COVID-19 from the Emergency Department. Radiol Artif Intell 2021;3:e200098. https://doi.org/10.1148/ryai.2020200098.

[44] Kim C, Hwang EJ, Choi YR, Choi H, Goo JM, Kim Y, et al. A Deep Learning Model Using Chest Radiographs for Prediction of 30-Day Mortality in Patients With Community-Acquired Pneumonia: Development and External Validation. AJR Am J Roentgenol 2023;221:586–98. https://doi.org/10.2214/ajr.23.29414.

[45] Kang SY, Cha WC, Yoo J, Kim T, Park JH, Yoon H, et al. Predicting 30-day mortality of patients with pneumonia in an emergency department setting using machine-learning models. Clinical and Experimental Emergency Medicine 2020;7:197–205. https://doi.org/10.15441/ceem.19.052.

[46] Jones BE, Ying J, Nevers M, Rutter ED, Chapman AB, Brenner R, et al. Hospital admission decisions for older Veterans with community‐onset pneumonia: An analysis of 118 U.S. Veterans Affairs Medical Centers. Academic Emergency Medicine 2023;30:398–409. https://doi.org/10.1111/acem.14655.

[47] Jones BE, Ying J, Nevers M, Alba PR, He T, Patterson OV, et al. Computerized mortality prediction for community-acquired pneumonia at 117 Veterans Affairs Medical Centers. Annals of the American Thoracic Society 2021;18:1175–84. https://doi.org/10.1513/AnnalsATS.202011-1372OC.

[48] Ji Y, Gao Y, Bao R, Li Q, Liu D, Sun Y, et al. Prediction of COVID-19 Patients’ Emergency Room Revisit using Multi-Source Transfer Learning. Proc (IEEE Int Conf Healthc Inform) 2023;2023:138–44. https://doi.org/10.1109/ichi57859.2023.00028.

[49] Jhaveri A, Abolhassani F, Fine B. Prospective External Validation of an AI-Based Emergency Department Pneumonia Disposition Prediction Tool. Canadian Association of Radiologists Journal 2025. https://doi.org/10.1177/08465371251320938.

[50] Husain S, Sage AT, del Sorbo L, Cypel M, Martinu T, Juvet SC, et al. A biomarker assay to risk-stratify patients with symptoms of respiratory tract infection. European Respiratory Journal 2022;60. https://doi.org/10.1183/13993003.00459-2022.

[51] Hinson JS, Zhao X, Klein E, Badaki-Makun O, Rothman R, Copenhaver M, et al. Multisite development and validation of machine learning models to predict severe outcomes and guide decision-making for emergency department patients with influenza. JACEP Open 2024;5. https://doi.org/10.1002/emp2.13117.

[52] Hinson JS, Klein E, Smith A, Toerper M, Dungarani T, Hager D, et al. Multisite implementation of a workflow-integrated machine learning system to optimize COVID-19 hospital admission decisions. Npj Digital Medicine 2022;5:1–10. https://doi.org/10.1038/s41746-022-00646-1.

[53] Henriksson A, Pawar Y, Hedberg P, Nauclér P. Multimodal fine-tuning of clinical language models for predicting COVID-19 outcomes. Artif Intell Med 2023;146:102695. https://doi.org/10.1016/j.artmed.2023.102695.

[54] Garrido NJ, González-Martínez F, Torres AM, Blasco-Segura P, Losada S, Plaza A, et al. Role of Artificial Intelligence in Identifying Vital Biomarkers with Greater Precision in Emergency Departments During Emerging Pandemics. International Journal of Molecular Sciences 2025;26. https://doi.org/10.3390/ijms26020722.

[55] Garrido NJ, González-Martínez F, Losada S, Plaza A, Del Olmo E, Mateo J. Innovation through Artificial Intelligence in Triage Systems for Resource Optimization in Future Pandemics. Biomimetics (Basel) 2024;9. https://doi.org/10.3390/biomimetics9070440.

[56] Fuller GW, Hasan M, Hodkinson P, McAlpine D, Goodacre S, Bath PA, et al. Training and testing of a gradient boosted machine learning model to predict adverse outcome in patients presenting to emergency departments with suspected covid-19 infection in a middle-income setting. PLoS Digital Health 2023;2:1–18. https://doi.org/10.1371/journal.pdig.0000309.

[57] Fong A, Adams KT, Khairat S, Galarraga JE. Using machine learning to predict emergency department return across two regional health systems; a generalizable model for COVID-19 patients. American Journal of Emergency Medicine 2025;91:173–4. https://doi.org/10.1016/j.ajem.2024.11.032.

[58] Dipaola F, Gatti M, Giaj Levra A, Menè R, Shiffer D, Faccincani R, et al. Multimodal deep learning for COVID-19 prognosis prediction in the emergency department: a bi-centric study. Scientific Reports 2023;13:10868. https://doi.org/10.1038/s41598-023-37512-3.

[59] Di Napoli A, Tagliente E, Pasquini L, Cipriano E, Pietrantonio F, Ortis P, et al. 3D CT-Inclusive Deep-Learning Model to Predict Mortality, ICU Admittance, and Intubation in COVID-19 Patients. Journal of Digital Imaging 2023;36:603–16. https://doi.org/10.1007/s10278-022-00734-4.

[60] Dayan I, Roth HR, Zhong A, Harouni A, Gentili A, Abidin AZ, et al. Federated learning for predicting clinical outcomes in patients with COVID-19. Nature Medicine 2021;27:1735–43. https://doi.org/10.1038/s41591-021-01506-3.

[61] Davazdahemami B, Zolbanin HM, Delen D. An explanatory machine learning framework for studying pandemics: The case of COVID-19 emergency department readmissions. Decis Support Syst 2022;161:113730. https://doi.org/10.1016/j.dss.2022.113730.

[62] Chung J, Kim D, Choi J, Yune S, Song KD, Kim S, et al. Prediction of oxygen requirement in patients with COVID-19 using a pre-trained chest radiograph xAI model: efficient development of auditable risk prediction models via a fine-tuning approach. Sci Rep 2022;12:21164. https://doi.org/10.1038/s41598-022-24721-5.

[63] Chen Y, Kao Y, Hsu C, Chen C, Ma Y, Shen Y, et al. Real‐time interactive artificial intelligence of things–based prediction for adverse outcomes in adult patients with pneumonia in the emergency department. Academic Emergency Medicine 2021;28:1277–85. https://doi.org/10.1111/acem.14339.

[64] Chamberlin JH, Aquino G, Schoepf UJ, Nance S, Godoy F, Carson L, et al. An Interpretable Chest CT Deep Learning Algorithm for Quantification of COVID-19 Lung Disease and Prediction of Inpatient Morbidity and Mortality. Academic Radiology 2022;29:1178–88. https://doi.org/10.1016/j.acra.2022.03.023.

[65] Chamberlin JH, Aquino G, Nance S, Wortham A, Leaphart N, Paladugu N, et al. Automated diagnosis and prognosis of COVID-19 pneumonia from initial ER chest X-rays using deep learning. BMC Infectious Diseases 2022;22. https://doi.org/10.1186/s12879-022-07617-7.

[66] Cato K, Kim E, Knaplund C, Romney M, Sacco D, Chernick L, et al. A Prognostic Model for COVID-19 Progression to Severe Disease: Discriminating Emergency Department Discharge With the Virus Without Return to the Hospital Within 72 Hours Using Electronic Medical Records. Journal of the New York State Nurses Association 2024;51:5–16.

[67] Catalano M, Bortolotto C, Nicora G, Achilli MF, Consonni A, Ruongo L, et al. Performance of an AI algorithm during the different phases of the COVID pandemics: what can we learn from the AI and vice versa. European Journal of Radiology Open 2023;11. https://doi.org/10.1016/j.ejro.2023.100497.

[68] Casiraghi E, Malchiodi D, Trucco G, Frasca M, Cappelletti L, Fontana T, et al. Explainable Machine Learning for Early Assessment of COVID-19 Risk Prediction in Emergency Departments. IEEE Access 2020;8:196299–325. https://doi.org/10.1109/access.2020.3034032.

[69] Calvillo-Batllés P, Cerdá-Alberich L, Fonfría-Esparcia C, Carreres-Ortega A, Muñoz-Núñez CF, Trilles-Olaso L, et al. Development of severity and mortality prediction models for covid-19 patients at emergency department including the chest x-ray. Radiologia (Engl Ed) 2022;64:214–27. https://doi.org/10.1016/j.rxeng.2021.09.004.

[70] Butler L, Karabayir I, Samie Tootooni M, Afshar M, Goldberg A, Akbilgic O. Image and structured data analysis for prognostication of health outcomes in patients presenting to the ED during the COVID-19 pandemic. International Journal of Medical Informatics 2022;158:N.PAG-N.PAG. https://doi.org/10.1016/j.ijmedinf.2021.104662.

[71] Beiser DG, Jarou ZJ, Kassir AA, Puskarich MA, Vrablik MC, Rosenman ED, et al. Predicting 30-day return hospital admissions in patients with COVID-19 discharged from the emergency department: A national retrospective cohort study. JACEP Open 2021;2. https://doi.org/10.1002/emp2.12595.

[72] Bartolucci M, Benelli M, Betti M, Bicchi S, Fedeli L, Giannelli F, et al. The incremental value of computed tomography of COVID-19 pneumonia in predicting ICU admission. Scientific Reports 2021;11:15619. https://doi.org/10.1038/s41598-021-95114-3.

[73] Bartenschlager CC, Grieger M, Erber J, Neidel T, Borgmann S, Vehreschild JJ, et al. Covid-19 triage in the emergency department 2.0: how analytics and AI transform a human-made algorithm for the prediction of clinical pathways. Health Care Management Science 2023;26:412–29. https://doi.org/10.1007/s10729-023-09647-2.

[74] Asteris PG, Gandomi AH, Armaghani DJ, Kokoris S, Papandreadi AT, Roumelioti A, et al. Prognosis of COVID-19 severity using DERGA, a novel machine learning algorithm. European Journal of Internal Medicine 2024;125:67–73. https://doi.org/10.1016/j.ejim.2024.02.037.

[75] Ahmed A, Zengul FD, Khan S, Hearld KR, Feldman SS, Hall AG, et al. Developing a decision model to early predict ICU admission for COVID-19 patients: A machine learning approach. Intelligence-Based Medicine 2024;9. https://doi.org/10.1016/j.ibmed.2024.100136.

[76] Etu E, Monplaisir L, Arslanturk S, Masoud S, Aguwa C, Markevych I, et al. Prediction of Length of Stay in the Emergency Department for COVID-19 Patients: A Machine Learning Approach. IEEE ACCESS 2022;10:42229–37. https://doi.org/10.1109/ACCESS.2022.3168045.

[77] van Delft R, de Carvalho R. Using machine learning techniques to support the emergency department. Computing and informatics 2022;41:154–71. https://doi.org/10.31577/cai_2022_1_154.

[78] La Salvia M, Torti E, Secco G, Bellazzi C, Salinaro F, Lago P, et al. Machine-Learning-Based COVID-19 and Dyspnoea Prediction Systems for the Emergency Department. Applied Sciences-Basel 2022;12. https://doi.org/10.3390/app122110869.

[79] Eurich D, Lau D, Li W, Weaver O, Joon T, Ye M, et al. Predicting COVID-19 Outcomes Among Albertans With Diabetes and COVID-19: A Machine Learning Approach. Advances in artificial intelligence and machine learning 2025;5:3565–604.

[80] Gabbay F, Bar-Lev S, Montano O, Hadad N. A LIME-Based Explainable Machine Learning Model for Predicting the Severity Level of COVID-19 Diagnosed Patients. Applied Sciences-Basel 2021;11. https://doi.org/10.3390/app112110417.
